# Supplementary material for: Simulated Non-Local EPR Correlation: CHSH = 3
Source: Preprints.org preprint supplement (doi:10.20944/preprints202301.0570.v1), 2023-01-31
Supplement: Supplementary file 1 [file supplementary]

## Sheet: Decompose clicks
	RAW COUNTS				TOTAL NO. CLICKS			NORMALIZED					CORRELATION FROM POL AND COH						FULL CORRELATION						COHERENCE DIFFERENCES						TRIG FUNCTIONS
degrees	EQP	NEQP	EQC	NEQC	NTP	NTC	degrees	EQP	NEQP	EQC	NEQC	degrees			EQP-NEQP	EQC-NEQC				EQ+EQC -NEQP-NEQCP						EQC-NEQC	EQC+NEQC				EQC+NEQP	EQC-NEQP	EQP+NEQC	EQP-NEQC
					CONSTANT
																																							mf	"-cos"	InvTrig		simulated
0	1	52707	26710	25998	52708	52708	0	1.89725e-05	0.999981	0.506754	0.493246			-0.99722	-0.999962	0.0135084				-0.986454					0	0.0135084	0			0	1.50674	-0.493227	`	0.493265				0	#NAME?	-0.983712	-0.99722	0	-0.99722	#NAME?				0	0.013509
5	1445	51263	25171	27537	52708	52708	5	0.0274152	0.972585	0.477556	0.522444			-0.942578	-0.94517	-0.0448888				-0.990058					5	-0.0448888	0			5	1.45014	-0.495029	-0.495029	0.54986				5	-0.044928	-0.987506	-0.942578	5	-0.942578	-0.89765	0	0.013509		5	-0.044928
10	2889	49819	23967	28741	52708	52708	10	0.0548114	0.945189	0.454713	0.545287			-0.887936	-0.890377	-0.0905745				-0.980952					10	-0.0905745	0			10	1.3999	-0.490476	-0.490476	0.600099				10	-0.090615	-0.978551	-0.887936	10	-0.887936	-0.797321	5	-0.044928		10	-0.090615
15	4333	48375	22923	29785	52708	52708	15	0.0822076	0.917792	0.434906	0.565094			-0.833294	-0.835585	-0.130189				-0.965774					15	-0.130189	0			15	1.3527	-0.482887	-0.482887	0.647302				15	-0.130231	-0.963524	-0.833294	15	-0.833294	-0.703063	10	-0.090615		15	-0.130231
20	5777	46931	22039	30669	52708	52708	20	0.109604	0.890396	0.418134	0.581866			-0.778652	-0.780792	-0.163732				-0.944525					20	-0.163732	0			20	1.30853	-0.472262	-0.472262	0.69147				20	-0.163775	-0.942426	-0.778652	20	-0.778652	-0.614877	15	-0.130231		20	-0.163775
25	7221	45487	21323	31385	52708	52708	25	0.137	0.863	0.40455	0.59545			-0.724009	-0.726	-0.190901				-0.916901					25	-0.190901	0			25	1.26755	-0.45845	-0.45845	0.73245				25	-0.191172	-0.915181	-0.724009	25	-0.724009	-0.532838	20	-0.163775		25	-0.191172
30	8665	44043	20767	31941	52708	52708	30	0.164396	0.835604	0.394001	0.605999			-0.669367	-0.671207	-0.211998				-0.883206					30	-0.211998	0			30	1.2296	-0.441603	-0.441603	0.770395				30	-0.212422	-0.881789	-0.669367	30	-0.669367	-0.456946	25	-0.191172		30	-0.212422
35	10109	42599	20371	32337	52708	52708	35	0.191793	0.808207	0.386488	0.613512			-0.614725	-0.616415	-0.227024				-0.843439					35	-0.227024	0			35	1.1947	-0.42172	-0.42172	0.805305				35	-0.2276	-0.842325	-0.614725	35	-0.614725	-0.387125	30	-0.212422		35	-0.2276
40	11553	41155	20135	32573	52708	52708	40	0.219189	0.780811	0.38201	0.61799			-0.560083	-0.561623	-0.235979				-0.797602					40	-0.235979	0			40	1.16282	-0.398801	-0.398801	0.837178				40	-0.236707	-0.79679	-0.560083	40	-0.560083	-0.323376	35	-0.2276		40	-0.236707
45	12997	39711	20061	32647	52708	52708	45	0.246585	0.753415	0.380606	0.619394			-0.505441	-0.50683	-0.238787				-0.745617					45	-0.238787	0			45	1.13402	-0.372809	-0.372809	0.865979				45	-0.239724	-0.745164	-0.505441	45	-0.505441	-0.265717	40	-0.236707		45	-0.239724
50	14441	38267	20125	32583	52708	52708	50	0.273981	0.726019	0.381821	0.618179			-0.450798	-0.452038	-0.236359				-0.688396					50	-0.236359	0			50	1.10784	-0.344198	-0.344198	0.892161				50	-0.237447	-0.688245	-0.450798	50	-0.450798	-0.213351	45	-0.239724		50	-0.237447
55	15885	36823	20349	32359	52708	52708	55	0.301377	0.698623	0.38607	0.61393			-0.396156	-0.397245	-0.227859				-0.625104					55	-0.227859	0			55	1.08469	-0.312552	-0.312552	0.915307				55	-0.229099	-0.625255	-0.396156	55	-0.396156	-0.167057	50	-0.237447		55	-0.229099
60	17329	35379	20733	31975	52708	52708	60	0.328774	0.671226	0.393356	0.606644			-0.341514	-0.342453	-0.213288				-0.555741					60	-0.213288	0			60	1.06458	-0.277871	-0.277871	0.935418				60	-0.214679	-0.556193	-0.341514	60	-0.341514	-0.126834	55	-0.229099		60	-0.214679
65	18773	33935	21277	31431	52708	52708	65	0.35617	0.64383	0.403677	0.596323			-0.286872	-0.28766	-0.192646				-0.480307					65	-0.192646	0			65	1.04751	-0.240153	-0.240153	0.952493				65	-0.194189	-0.48106	-0.286872	65	-0.286872	-0.0926831	60	-0.214679		65	-0.194189
70	20217	32491	21979	30729	52708	52708	70	0.383566	0.616434	0.416996	0.583004			-0.232229	-0.232868	-0.166009				-0.398877					70	-0.166009	0			70	1.03343	-0.199438	-0.199438	0.966571				70	-0.167569	-0.399799	-0.232229	70	-0.232229	-0.06466	65	-0.194189		70	-0.167569
75	21661	31047	22843	29865	52708	52708	75	0.410962	0.589038	0.433388	0.566612			-0.177587	-0.178075	-0.133225				-0.3113					75	-0.133225	0			75	1.02243	-0.15565	-0.15565	0.977575				75	-0.134784	-0.312371	-0.177587	75	-0.177587	-0.0428031	70	-0.167569		75	-0.134784
80	23105	29603	23867	28841	52708	52708	80	0.438359	0.561641	0.452816	0.547184			-0.122945	-0.123283	-0.094369				-0.217652					80	-0.094369	0			80	1.01446	-0.108826	-0.108826	0.985543				80	-0.0959274	-0.218872	-0.122945	80	-0.122945	-0.0270175	75	-0.134784		80	-0.095927
85	24549	28159	25051	27657	52708	52708	85	0.465755	0.534245	0.475279	0.524721			-0.068303	-0.0684906	-0.0494422				-0.117933					85	-0.0494422	0			85	1.00952	-0.0589664	-0.0589664	0.990476				85	-0.0509994	-0.119302	-0.0683028	85	-0.0683028	-0.0173034	80	-0.095927		85	-0.050999
90	26715	25993	26753	25955	52708	52708	90	0.506849	0.493151	0.50757	0.49243			0.013661	0.0136981	0.01514				0.0288381					90	0.01514	0			90	1.00072	0.0144191	0.0144191	0.999279				90	0.0136795	0.0273401	0.0136606	90	0.0136606	-1.8973e-05	85	-0.050999		90	0.01368
95	28159	24549	28089	24619	52708	52708	95	0.534245	0.465755	0.532917	0.467083			0.068303	0.0684906	0.0658344				0.134325					95	0.0658344	0			95	0.998672	0.0671625	0.0671625	1.00133				95	0.0645271	0.13283	0.0683028	95	0.0683028	0.00377563	90	0.01368		95	0.064527
100	29603	23105	29265	23443	52708	52708	100	0.561641	0.438359	0.555229	0.444771			0.122945	0.123283	0.110458				0.233741					100	0.110458	0			100	0.993587	0.11687	0.11687	1.00641				100	0.109303	0.232248	0.122945	100	0.122945	0.0136416	95	0.064527		100	0.109303
105	31047	21661	30281	22427	52708	52708	105	0.589038	0.410962	0.574505	0.425495			0.177587	0.178075	0.14901				0.327085					105	0.14901	0			105	0.985467	0.163543	0.163543	1.01453				105	0.148008	0.325596	0.177587	105	0.177587	0.0295789	100	0.109303		105	0.148008
110	32491	20217	31137	21571	52708	52708	110	0.616434	0.383566	0.590745	0.409255			0.232229	0.232868	0.18149				0.414358					110	0.18149	0			110	0.974311	0.207179	0.207179	1.02569				110	0.180642	0.412871	0.232229	110	0.232229	0.0515876	105	0.148008		110	0.180642
115	33935	18773	31825	20883	52708	52708	115	0.64383	0.35617	0.603798	0.396202			0.286872	0.28766	0.207597				0.495257					115	0.207597	0			115	0.959968	0.247628	0.247628	1.04003				115	0.207109	0.493981	0.286872	115	0.286872	0.0797625	110	0.180642		115	0.207109
120	35379	17329	32353	20355	52708	52708	120	0.671226	0.328774	0.613816	0.386184			0.341514	0.342453	0.227631				0.570084					120	0.227631	0			120	0.942589	0.285042	0.285042	1.05741				120	0.227448	0.568962	0.341514	120	0.341514	0.114066	115	0.207109		120	0.227448
125	36823	15885	32721	19987	52708	52708	125	0.698623	0.301377	0.620798	0.379202			0.396156	0.397245	0.241595				0.63884					125	0.241595	0			125	0.922175	0.31942	0.31942	1.07782				125	0.241716	0.637872	0.396156	125	0.396156	0.15444	120	0.227448		125	0.241716
130	38267	14441	32929	19779	52708	52708	130	0.726019	0.273981	0.624744	0.375256			0.450798	0.452038	0.249488				0.701525					130	0.249488	0			130	0.898725	0.350763	0.350763	1.10127				130	0.249912	0.700711	0.450798	130	0.450798	0.200886	125	0.241716		130	0.249912
135	39711	12997	32979	19729	52708	52708	135	0.753415	0.246585	0.625692	0.374308			0.505441	0.50683	0.251385				0.758215					135	0.251385	0			135	0.872277	0.379108	0.379108	1.12772				135	0.252056	0.757497	0.505441	135	0.505441	0.253384	130	0.249912		135	0.252056
140	41155	11553	32903	19805	52708	52708	140	0.780811	0.219189	0.624251	0.375749			0.560083	0.561623	0.248501				0.810124					140	0.248501	0			140	0.843439	0.405062	0.405062	1.15656				140	0.249172	0.809255	0.560083	140	0.560083	0.31091	135	0.252056		140	0.249172
145	42599	10109	32667	20041	52708	52708	145	0.808207	0.191793	0.619773	0.380227			0.614725	0.616415	0.239546				0.855961					145	0.239546	0			145	0.811566	0.427981	0.427981	1.18843				145	0.240217	0.854942	0.614725	145	0.614725	0.374508	140	0.249172		145	0.240217
150	44043	8665	32271	20437	52708	52708	150	0.835604	0.164396	0.61226	0.38774			0.669367	0.671207	0.22452				0.895727					150	0.22452	0			150	0.776656	0.447864	0.447864	1.22334				150	0.22519	0.894558	0.669367	150	0.669367	0.444177	145	0.240217		150	0.22519
155	45487	7221	31715	20993	52708	52708	155	0.863	0.137	0.601711	0.398289			0.724009	0.726	0.203423				0.929422					155	0.203423	0			155	0.738711	0.464711	0.464711	1.26129				155	0.204092	0.928102	0.724009	155	0.724009	0.519917	150	0.22519		155	0.204092
160	46931	5777	30999	21709	52708	52708	160	0.890396	0.109604	0.588127	0.411873			0.778652	0.780792	0.176254				0.957046					160	0.176254	0			160	0.697731	0.478523	0.478523	1.30227				160	0.176847	0.955499	0.778652	160	0.778652	0.601804	155	0.204092		160	0.176847
165	48375	4333	30123	22585	52708	52708	165	0.917792	0.0822076	0.571507	0.428493			0.833294	0.835585	0.143014				0.978599					165	0.143014	0			165	0.653715	0.4893	0.4893	1.34629				165	0.143455	0.976749	0.833294	165	0.833294	0.689839	160	0.176847		165	0.143455
170	49819	2889	29087	23621	52708	52708	170	0.945189	0.0548114	0.551852	0.448148			0.887936	0.890377	0.103703				0.994081					170	0.103703	0			170	0.606663	0.49704	0.49704	1.39334				170	0.103991	0.991927	0.887936	170	0.887936	0.783945	165	0.143455		170	0.103991
175	51263	1445	27891	24817	52708	52708	175	0.972585	0.0274152	0.529161	0.470839			0.942578	0.94517	0.0583213				1.00349					175	0.0583213	0			175	0.556576	0.501745	0.501745	1.44342				175	0.0584558	1.00103	0.942578	175	0.942578	0.884122	170	0.103991		175	0.058456
180	52707	1	26533	26175	52708	52708	180	0.999981	1.89725e-05	0.503396	0.496604			0.99722	0.999962	0.00679214				1.00675					180	0.00679214	0			180	0.503415	0.503377	0.503377	1.49658				180	0.00686822	1.00409	0.99722	180	0.99722	0.990352	175	0.058456		180	0.006868
185	51263	1445	27897	24811	52708	52708	185	0.972585	0.0274152	0.529274	0.470726			0.942578	0.94517	0.058549				1.00372					185	0.058549	0			185	0.55669	0.501859	0.501859	1.44331				185	0.0586265	1.0012	0.942578	185	0.942578	0.883952	180	0.006868		185	0.058627
190	49819	2889	29101	23607	52708	52708	190	0.945189	0.0548114	0.552117	0.447883			0.887936	0.890377	0.104235				0.994612					190	0.104235	0			190	0.606929	0.497306	0.497306	1.39307				190	0.104314	0.99225	0.887936	190	0.887936	0.783623	185	0.058627		190	0.104314
195	48375	4333	30145	22563	52708	52708	195	0.917792	0.0822076	0.571925	0.428075			0.833294	0.835585	0.143849				0.979434					195	0.143849	0			195	0.654132	0.489717	0.489717	1.34587				195	0.143929	0.977223	0.833294	195	0.833294	0.689365	190	0.104314		195	0.143929
200	46931	5777	31029	21679	52708	52708	200	0.890396	0.109604	0.588696	0.411304			0.778652	0.780792	0.177392				0.958185					200	0.177392	0			200	0.6983	0.479092	0.479092	1.3017				200	0.177473	0.956125	0.778652	200	0.778652	0.601178	195	0.143929		200	0.177473
205	45487	7221	31745	20963	52708	52708	205	0.863	0.137	0.60228	0.39772			0.724009	0.726	0.204561				0.930561					205	0.204561	0			205	0.739281	0.46528	0.46528	1.26072				205	0.20487	0.92888	0.724009	205	0.724009	0.519139	200	0.177473		205	0.20487
210	44043	8665	32301	20407	52708	52708	210	0.835604	0.164396	0.612829	0.387171			0.669367	0.671207	0.225658				0.896866					210	0.225658	0			210	0.777225	0.448433	0.448433	1.22277				210	0.22612	0.895487	0.669367	210	0.669367	0.443247	205	0.20487		210	0.22612
215	42599	10109	32697	20011	52708	52708	215	0.808207	0.191793	0.620342	0.379658			0.614725	0.616415	0.240685				0.857099					215	0.240685	0			215	0.812135	0.42855	0.42855	1.18787				215	0.241299	0.856023	0.614725	215	0.614725	0.373426	210	0.22612		215	0.241299
220	41155	11553	32933	19775	52708	52708	220	0.780811	0.219189	0.62482	0.37518			0.560083	0.561623	0.24964				0.811262					220	0.24964	0			220	0.844008	0.405631	0.405631	1.15599				220	0.250406	0.810488	0.560083	220	0.560083	0.309677	215	0.241299		220	0.250406
225	39711	12997	33007	19701	52708	52708	225	0.753415	0.246585	0.626224	0.373776			0.505441	0.50683	0.252447				0.759278					225	0.252447	0			225	0.872809	0.379639	0.379639	1.12719				225	0.253422	0.758863	0.505441	225	0.505441	0.252018	220	0.250406		225	0.253422
230	38267	14441	32943	19765	52708	52708	230	0.726019	0.273981	0.625009	0.374991			0.450798	0.452038	0.250019				0.702057					230	0.250019	0			230	0.898991	0.351028	0.351028	1.10101				230	0.251145	0.701944	0.450798	230	0.450798	0.199653	225	0.253422		230	0.251145
235	36823	15885	32719	19989	52708	52708	235	0.698623	0.301377	0.62076	0.37924			0.396156	0.397245	0.241519				0.638765					235	0.241519	0			235	0.922137	0.319382	0.319382	1.07786				235	0.242797	0.638953	0.396156	235	0.396156	0.153359	230	0.251145		235	0.242797
240	35379	17329	32335	20373	52708	52708	240	0.671226	0.328774	0.613474	0.386526			0.341514	0.342453	0.226948				0.569401					240	0.226948	0			240	0.942248	0.284701	0.284701	1.05775				240	0.228378	0.569892	0.341514	240	0.341514	0.113136	235	0.242797		240	0.228378
245	33935	18773	31791	20917	52708	52708	245	0.64383	0.35617	0.603153	0.396847			0.286872	0.28766	0.206306				0.493967					245	0.206306	0			245	0.959323	0.246983	0.246983	1.04068				245	0.207887	0.494759	0.286872	245	0.286872	0.0789846	240	0.228378		245	0.207887
250	32491	20217	31089	21619	52708	52708	250	0.616434	0.383566	0.589835	0.410165			0.232229	0.232868	0.179669				0.412537					250	0.179669	0			250	0.973401	0.206268	0.206268	1.0266				250	0.181268	0.413497	0.232229	250	0.232229	0.0509615	245	0.207887		250	0.181268
255	31047	21661	30225	22483	52708	52708	255	0.589038	0.410962	0.573442	0.426558			0.177587	0.178075	0.146885				0.32496					255	0.146885	0			255	0.984405	0.16248	0.16248	1.0156				255	0.148483	0.32607	0.177587	255	0.177587	0.0291046	250	0.181268		255	0.148483
260	29603	23105	29201	23507	52708	52708	260	0.561641	0.438359	0.554015	0.445985			0.122945	0.123283	0.108029				0.231312					260	0.108029	0			260	0.992373	0.115656	0.115656	1.00763				260	0.109626	0.232571	0.122945	260	0.122945	0.013319	255	0.148483		260	0.109626
265	28159	24549	28017	24691	52708	52708	265	0.534245	0.465755	0.531551	0.468449			0.068303	0.0684906	0.0631024				0.131593					265	0.0631024	0			265	0.997306	0.0657965	0.0657965	1.00269				265	0.0646979	0.133001	0.0683028	265	0.0683028	0.00360487	260	0.109626		265	0.064698
270	25993	26715	26315	26393	52708	52708	270	0.493151	0.506849	0.49926	0.50074			-0.013661	-0.0136981	-0.00147985				-0.015178					270	-0.00147985	0			270	1.00611	-0.00758898	-0.00758898	0.993891				270	1.8973e-05	-0.0136416	-0.0136606	270	-0.0136606	-0.0136795	265	0.064698		270	1.9e-05
275	24549	28159	24979	27729	52708	52708	275	0.465755	0.534245	0.473913	0.526087			-0.068303	-0.0684906	-0.0521742				-0.120665					275	-0.0521742	0			275	1.00816	-0.0603324	-0.0603324	0.991842				275	-0.0508286	-0.119131	-0.0683028	275	-0.0683028	-0.0174741	270	1.9e-05		275	-0.050829
280	23105	29603	23803	28905	52708	52708	280	0.438359	0.561641	0.451601	0.548399			-0.122945	-0.123283	-0.0967975				-0.22008					280	-0.0967975	0			280	1.01324	-0.11004	-0.11004	0.986757				280	-0.0956049	-0.21855	-0.122945	280	-0.122945	-0.0273401	275	-0.050829		280	-0.095605
285	21661	31047	22787	29921	52708	52708	285	0.410962	0.589038	0.432325	0.567675			-0.177587	-0.178075	-0.135349				-0.313425					285	-0.135349	0			285	1.02136	-0.156712	-0.156712	0.978637				285	-0.13431	-0.311897	-0.177587	285	-0.177587	-0.0432774	280	-0.095605		285	-0.13431
290	20217	32491	21931	30777	52708	52708	290	0.383566	0.616434	0.416085	0.583915			-0.232229	-0.232868	-0.16783				-0.400698					290	-0.16783	0			290	1.03252	-0.200349	-0.200349	0.967481				290	-0.166943	-0.399173	-0.232229	290	-0.232229	-0.0652861	285	-0.13431		290	-0.166943
295	18773	33935	21243	31465	52708	52708	295	0.35617	0.64383	0.403032	0.596968			-0.286872	-0.28766	-0.193936				-0.481597					295	-0.193936	0			295	1.04686	-0.240798	-0.240798	0.953138				295	-0.193411	-0.480282	-0.286872	295	-0.286872	-0.093461	290	-0.166943		295	-0.193411
300	17329	35379	20715	31993	52708	52708	300	0.328774	0.671226	0.393014	0.606986			-0.341514	-0.342453	-0.213971				-0.556424					300	-0.213971	0			300	1.06424	-0.278212	-0.278212	0.935759				300	-0.21375	-0.555264	-0.341514	300	-0.341514	-0.127764	295	-0.193411		300	-0.21375
305	15885	36823	20347	32361	52708	52708	305	0.301377	0.698623	0.386032	0.613968			-0.396156	-0.397245	-0.227935				-0.62518					305	-0.227935	0			305	1.08466	-0.31259	-0.31259	0.915345				305	-0.228017	-0.624173	-0.396156	305	-0.396156	-0.168139	300	-0.21375		305	-0.228017
310	14441	38267	20139	32569	52708	52708	310	0.273981	0.726019	0.382086	0.617914			-0.450798	-0.452038	-0.235828				-0.687865					310	-0.235828	0			310	1.10811	-0.343933	-0.343933	0.891895				310	-0.236214	-0.687012	-0.450798	310	-0.450798	-0.214585	305	-0.228017		310	-0.236214
315	12997	39711	20089	32619	52708	52708	315	0.246585	0.753415	0.381138	0.618862			-0.505441	-0.50683	-0.237725				-0.744555					315	-0.237725	0			315	1.13455	-0.372277	-0.372277	0.865447				315	-0.238358	-0.743798	-0.505441	315	-0.505441	-0.267083	310	-0.236214		315	-0.238358
320	11553	41155	20165	32543	52708	52708	320	0.219189	0.780811	0.382579	0.617421			-0.560083	-0.561623	-0.234841				-0.796464					320	-0.234841	0			320	1.16339	-0.398232	-0.398232	0.836609				320	-0.235474	-0.795557	-0.560083	320	-0.560083	-0.324609	315	-0.238358		320	-0.235474
325	10109	42599	20401	32307	52708	52708	325	0.191793	0.808207	0.387057	0.612943			-0.614725	-0.616415	-0.225886				-0.842301					325	-0.225886	0			325	1.19526	-0.42115	-0.42115	0.804736				325	-0.226519	-0.841243	-0.614725	325	-0.614725	-0.388206	320	-0.235474		325	-0.226519
330	8665	44043	20797	31911	52708	52708	330	0.164396	0.835604	0.39457	0.60543			-0.669367	-0.671207	-0.21086				-0.882067					330	-0.21086	0			330	1.23017	-0.441034	-0.441034	0.769826				330	-0.211492	-0.880859	-0.669367	330	-0.669367	-0.457875	325	-0.226519		330	-0.211492
335	7221	45487	21353	31355	52708	52708	335	0.137	0.863	0.405119	0.594881			-0.724009	-0.726	-0.189762				-0.915762					335	-0.189762	0			335	1.26812	-0.457881	-0.457881	0.731881				335	-0.190394	-0.914403	-0.724009	335	-0.724009	-0.533615	330	-0.211492		335	-0.190394
340	5777	46931	22069	30639	52708	52708	340	0.109604	0.890396	0.418703	0.581297			-0.778652	-0.780792	-0.162594				-0.943386					340	-0.162594	0			340	1.3091	-0.471693	-0.471693	0.690901				340	-0.163149	-0.9418	-0.778652	340	-0.778652	-0.615503	335	-0.190394		340	-0.163149
345	4333	48375	22945	29763	52708	52708	345	0.0822076	0.917792	0.435323	0.564677			-0.833294	-0.835585	-0.129354				-0.964939					345	-0.129354	0			345	1.35312	-0.482469	-0.482469	0.646885				345	-0.129756	-0.96305	-0.833294	345	-0.833294	-0.703538	340	-0.163149		345	-0.129756
350	2889	49819	23981	28727	52708	52708	350	0.0548114	0.945189	0.454978	0.545022			-0.887936	-0.890377	-0.0900433				-0.98042					350	-0.0900433	0			350	1.40017	-0.49021	-0.49021	0.599833				350	-0.0902925	-0.978228	-0.887936	350	-0.887936	-0.797644	345	-0.129756		350	-0.090292
355	1445	51263	25177	27531	52708	52708	355	0.0274152	0.972585	0.477669	0.522331			-0.942578	-0.94517	-0.0446612				-0.989831					355	-0.0446612	0			355	1.45025	-0.494915	-0.494915	0.549746				355	-0.0447573	-0.987336	-0.942578	355	-0.942578	-0.897821	350	-0.090292		355	-0.044757
360	1	52707	26535	26173	52708	52708	360	1.89725e-05	0.999981	0.503434	0.496566			-0.99722	-0.999962	0.00686803				-0.993094					360	0.00686803	0			360	1.50342	-0.496547	-0.496547	0.496585				360	0.00683028	-0.99039	-0.99722	360	-0.99722	-1.00405	355	-0.044757		360	0.00683
																																													360	0.00683
		degrees						EQP	NEQP	EQC	NEQC
			EQPNEQPMm	EQPNEQPMp	EQCNEQCm	EQCNEQCp								EQCNEQCp		simIV triangle	INVERT
		0	-0.491856	0.494635	-0.491856	1.50536		0.00138977	0.99861	0.506754	0.493246			0	0.00277954	-0.99722	-1	-0.967542	0.0324578	-1
		5	-0.493753	0.551175	-0.493753	1.44883		0.0287109	0.971289	0.477536	0.522464			5	0.0018662	-0.942578	-0.944444	-0.913508	0.030936	-0.944444
		10	-0.489276	0.601339	-0.489276	1.39866		0.056032	0.943968	0.454692	0.545308			10	0.000952866	-0.887936	-0.888889	-0.857598	0.0312904	-0.888889
		15	-0.481762	0.648468	-0.481762	1.35153		0.0833531	0.916647	0.434885	0.565115			15	3.95267e-05	-0.833294	-0.833333	-0.802064	0.0312696	-0.833333
		20	-0.471213	0.692562	-0.471213	1.30744		0.110674	0.889326	0.418113	0.581887			20	-0.000873811	-0.778652	-0.777778	-0.746154	0.0316239	-0.777778
		25	-0.457591	0.733581	-0.457591	1.26642		0.137995	0.862005	0.404414	0.595586			25	-0.00178715	-0.724009	-0.722222	-0.690619	0.0316031	-0.722222
		30	-0.440894	0.771527	-0.440894	1.22847		0.165316	0.834684	0.393789	0.606211			30	-0.00270049	-0.669367	-0.666667	-0.634709	0.0319575	-0.666667
		35	-0.421162	0.806438	-0.421162	1.19356		0.192638	0.807362	0.3862	0.6138			35	-0.00361383	-0.614725	-0.611111	-0.578799	0.0323119	-0.611111
		40	-0.398395	0.838312	-0.398395	1.16169		0.219959	0.780041	0.381646	0.618354			40	-0.00452717	-0.560083	-0.555556	-0.522889	0.0326662	-0.555556
		45	-0.372582	0.867142	-0.372582	1.13286		0.24728	0.75272	0.380138	0.619862			45	-0.00544051	-0.505441	-0.5	-0.467355	0.0326454	-0.5
		50	-0.344123	0.893324	-0.344123	1.10668		0.274601	0.725399	0.381277	0.618723			50	-0.00635384	-0.450798	-0.444444	-0.41182	0.0326246	-0.444444
		55	-0.312627	0.916471	-0.312627	1.08353		0.301922	0.698078	0.385451	0.614549			55	-0.00726718	-0.396156	-0.388889	-0.35666	0.0322285	-0.388889
		60	-0.278097	0.936583	-0.278097	1.06342		0.329243	0.670757	0.39266	0.60734			60	-0.00818052	-0.341514	-0.333333	-0.301126	0.0322076	-0.333333
		65	-0.24053	0.953658	-0.24053	1.04634		0.356564	0.643436	0.402906	0.597094			65	-0.00909386	-0.286872	-0.277778	-0.245591	0.0321868	-0.277778
		70	-0.199899	0.96767	-0.199899	1.03233		0.383885	0.616115	0.416215	0.583785			70	-0.0100072	-0.232229	-0.222222	-0.190056	0.0321659	-0.222222
		75	-0.156186	0.978598	-0.156186	1.0214		0.411206	0.588794	0.432608	0.567392			75	-0.0109205	-0.177587	-0.166667	-0.134522	0.0321451	-0.166667
		80	-0.109436	0.986491	-0.109436	1.01351		0.438528	0.561472	0.452036	0.547964			80	-0.0118339	-0.122945	-0.111111	-0.0789869	0.0321242	-0.111111
		85	-0.0596511	0.991348	-0.0596511	1.00865		0.465849	0.534151	0.4745	0.5255			85	-0.0127472	-0.0683028	-0.0555556	-0.0234522	0.0321034	-0.0555556
		90	0.01367	0.999991	0.01367	1.00001		0.50683	0.49317	0.50684	0.49316			90	0.0136606	0.0136606	0	0.0320826	0.0320826	0
		95	0.066415	1.00189	0.066415	0.998112		0.534151	0.465849	0.532264	0.467736			95	0.0127472	0.0683028	0.0555556	0.0876173	0.0320617	0.0555556
		100	0.116124	1.00682	0.116124	0.993179		0.561472	0.438528	0.554652	0.445348			100	0.0118339	0.122945	0.111111	0.143152	0.0320409	0.111111
		105	0.162798	1.01479	0.162798	0.985211		0.588794	0.411206	0.574004	0.425996			105	0.0109205	0.177587	0.166667	0.198311	0.0316448	0.166667
		110	0.206436	1.02579	0.206436	0.974206		0.616115	0.383885	0.590321	0.409679			110	0.0100072	0.232229	0.222222	0.253846	0.0316239	0.222222
		115	0.24699	1.03988	0.24699	0.960119		0.643436	0.356564	0.603555	0.396445			115	0.00909386	0.286872	0.277778	0.309006	0.0312278	0.277778
		120	0.284481	1.05703	0.284481	0.942967		0.670757	0.329243	0.613724	0.386276			120	0.00818052	0.341514	0.333333	0.36454	0.031207	0.333333
		125	0.318936	1.07722	0.318936	0.92278		0.698078	0.301922	0.620858	0.379142			125	0.00726718	0.396156	0.388889	0.420075	0.0311862	0.388889
		130	0.350355	1.10044	0.350355	0.899557		0.725399	0.274601	0.624956	0.375044			130	0.00635384	0.450798	0.444444	0.475985	0.0315405	0.444444
		135	0.378748	1.12669	0.378748	0.873308		0.75272	0.24728	0.626028	0.373972			135	0.00544051	0.505441	0.5	0.531895	0.0318949	0.5
		140	0.404628	1.15546	0.404628	0.844545		0.780041	0.219959	0.624586	0.375414			140	0.00452717	0.560083	0.555556	0.587805	0.0322493	0.555556
		145	0.427471	1.18725	0.427471	0.812746		0.807362	0.192638	0.620109	0.379891			145	0.00361383	0.614725	0.611111	0.643715	0.0326037	0.611111
		150	0.447279	1.22209	0.447279	0.777912		0.834684	0.165316	0.612595	0.387405			150	0.00270049	0.669367	0.666667	0.699625	0.0329581	0.666667
		155	0.464051	1.25996	0.464051	0.740042		0.862005	0.137995	0.602046	0.397954			155	0.00178715	0.724009	0.722222	0.755535	0.0333125	0.722222
		160	0.477749	1.3009	0.477749	0.699098		0.889326	0.110674	0.588424	0.411576			160	0.000873811	0.778652	0.777778	0.810694	0.0329164	0.777778
		165	0.488374	1.34492	0.488374	0.65508		0.916647	0.0833531	0.571727	0.428273			165	-3.95267e-05	0.833294	0.833333	0.866229	0.0328955	0.833333
		170	0.495963	1.39197	0.495963	0.608027		0.943968	0.056032	0.551995	0.448005			170	-0.000952866	0.887936	0.888889	0.921388	0.0324995	0.888889
		175	0.500517	1.44206	0.500517	0.557939		0.971289	0.0287109	0.529228	0.470772			175	-0.0018662	0.942578	0.944444	0.976923	0.0324786	0.944444
		180	0.502044	1.49518	0.502044	0.504824		0.99861	0.00138977	0.503434	0.496566			180	-0.00277954	0.99722	1	0.963415	-0.0365854	1
		185	0.500602	1.44198	0.500602	0.558024		0.971289	0.0287109	0.529313	0.470687			185	-0.0018662	0.942578	0.944444	0.911632	-0.0328121	0.944444
		190	0.496125	1.39181	0.496125	0.608189		0.943968	0.056032	0.552157	0.447843			190	-0.000952866	0.887936	0.888889	0.856473	-0.0324161	0.888889
		195	0.488611	1.34468	0.488611	0.655318		0.916647	0.0833531	0.571965	0.428035			195	-3.95267e-05	0.833294	0.833333	0.800938	-0.0323953	0.833333
		200	0.478062	1.30059	0.478062	0.699411		0.889326	0.110674	0.588737	0.411263			200	0.000873811	0.778652	0.777778	0.746154	-0.0316239	0.777778
		205	0.46444	1.25957	0.46444	0.74043		0.862005	0.137995	0.602435	0.397565			205	0.00178715	0.724009	0.722222	0.690619	-0.0316031	0.722222
		210	0.447744	1.22162	0.447744	0.778376		0.834684	0.165316	0.61306	0.38694			210	0.00270049	0.669367	0.666667	0.63546	-0.031207	0.666667
		215	0.428012	1.18671	0.428012	0.813287		0.807362	0.192638	0.620649	0.379351			215	0.00361383	0.614725	0.611111	0.579925	-0.0311862	0.611111
		220	0.405244	1.15484	0.405244	0.845161		0.780041	0.219959	0.625203	0.374797			220	0.00452717	0.560083	0.555556	0.525141	-0.0304149	0.555556
		225	0.379431	1.12601	0.379431	0.873991		0.75272	0.24728	0.626711	0.373289			225	0.00544051	0.505441	0.5	0.469606	-0.030394	0.5
		230	0.350972	1.09983	0.350972	0.900174		0.725399	0.274601	0.625573	0.374427			230	0.00635384	0.450798	0.444444	0.414822	-0.0296227	0.444444
		235	0.319477	1.07668	0.319477	0.923321		0.698078	0.301922	0.621399	0.378601			235	0.00726718	0.396156	0.388889	0.359287	-0.0296018	0.388889
		240	0.284946	1.05657	0.284946	0.943432		0.670757	0.329243	0.614189	0.385811			240	0.00818052	0.341514	0.333333	0.304503	-0.0288305	0.333333
		245	0.247379	1.03949	0.247379	0.960508		0.643436	0.356564	0.603944	0.396056			245	0.00909386	0.286872	0.277778	0.248968	-0.0288097	0.277778
		250	0.206749	1.02548	0.206749	0.974519		0.616115	0.383885	0.590634	0.409366			250	0.0100072	0.232229	0.222222	0.193433	-0.0287888	0.222222
		255	0.163035	1.01455	0.163035	0.985448		0.588794	0.411206	0.574241	0.425759			255	0.0109205	0.177587	0.166667	0.137899	-0.028768	0.166667
		260	0.116285	1.00666	0.116285	0.99334		0.561472	0.438528	0.554813	0.445187			260	0.0118339	0.122945	0.111111	0.082364	-0.0287471	0.111111
		265	0.0665003	1.0018	0.0665003	0.998198		0.534151	0.465849	0.532349	0.467651			265	0.0127472	0.0683028	0.0555556	0.0268293	-0.0287263	0.0555556
		270	-0.00682079	0.99316	-0.00682079	1.00684		0.49317	0.50683	0.500009	0.499991			270	-0.0136606	-0.0136606	0	-0.0287054	-0.0287054	0
		275	-0.0595657	0.991263	-0.0595657	1.00874		0.465849	0.534151	0.474586	0.525414			275	-0.0127472	-0.0683028	-0.0555556	-0.0842401	-0.0286846	-0.0555556
		280	-0.109275	0.98633	-0.109275	1.01367		0.438528	0.561472	0.452198	0.547802			280	-0.0118339	-0.122945	-0.111111	-0.139775	-0.0286637	-0.111111
		285	-0.155949	0.978361	-0.155949	1.02164		0.411206	0.588794	0.432845	0.567155			285	-0.0109205	-0.177587	-0.166667	-0.19531	-0.0286429	-0.166667
		290	-0.199586	0.967357	-0.199586	1.03264		0.383885	0.616115	0.416528	0.583472			290	-0.0100072	-0.232229	-0.222222	-0.25122	-0.0289973	-0.222222
		295	-0.240141	0.95327	-0.240141	1.04673		0.356564	0.643436	0.403295	0.596705			295	-0.00909386	-0.286872	-0.277778	-0.307129	-0.0293517	-0.277778
		300	-0.277632	0.936118	-0.277632	1.06388		0.329243	0.670757	0.393125	0.606875			300	-0.00818052	-0.341514	-0.333333	-0.363039	-0.0297061	-0.333333
		305	-0.312087	0.915931	-0.312087	1.08407		0.301922	0.698078	0.385991	0.614009			305	-0.00726718	-0.396156	-0.388889	-0.418574	-0.0296852	-0.388889
		310	-0.343506	0.892708	-0.343506	1.10729		0.274601	0.725399	0.381893	0.618107			310	-0.00635384	-0.450798	-0.444444	-0.474109	-0.0296644	-0.444444
		315	-0.371899	0.866459	-0.371899	1.13354		0.24728	0.75272	0.380821	0.619179			315	-0.00544051	-0.505441	-0.5	-0.529268	-0.0292683	-0.5
		320	-0.397778	0.837696	-0.397778	1.1623		0.219959	0.780041	0.382263	0.617737			320	-0.00452717	-0.560083	-0.555556	-0.584803	-0.0292474	-0.555556
		325	-0.420622	0.805897	-0.420622	1.1941		0.192638	0.807362	0.386741	0.613259			325	-0.00361383	-0.614725	-0.611111	-0.639962	-0.0288514	-0.611111
		330	-0.44043	0.771062	-0.44043	1.22894		0.165316	0.834684	0.394254	0.605746			330	-0.00270049	-0.669367	-0.666667	-0.695497	-0.0288305	-0.666667
		335	-0.457202	0.733192	-0.457202	1.26681		0.137995	0.862005	0.404803	0.595197			335	-0.00178715	-0.724009	-0.722222	-0.750281	-0.0280592	-0.722222
		340	-0.4709	0.692249	-0.4709	1.30775		0.110674	0.889326	0.418426	0.581574			340	-0.000873811	-0.778652	-0.777778	-0.805816	-0.0280383	-0.777778
		345	-0.481525	0.648231	-0.481525	1.35177		0.0833531	0.916647	0.435122	0.564878			345	3.95267e-05	-0.833294	-0.833333	-0.8606	-0.027267	-0.833333
		350	-0.489114	0.601178	-0.489114	1.39882		0.056032	0.943968	0.454854	0.545146			350	0.000952866	-0.887936	-0.888889	-0.916135	-0.0272462	-0.888889
		355	-0.493668	0.55109	-0.493668	1.44891		0.0287109	0.971289	0.477621	0.522379			355	0.0018662	-0.942578	-0.944444	-0.970919	-0.0264749	-0.944444
		360	-0.495195	0.497975	-0.495195	1.50203		0.00138977	0.99861	0.503415	0.496585			360	0.00277954	-0.99722	-1	-0.963039	0.0369606	-1
																0

## Sheet: EPR plots
angles	Radians	angles	Blue	Red	Cosine																		Pol	Pi	Pi/2	Pi/4	Pi/8		Result			Pol	Cosine
0	0	0		-0.0324578	-1	-0.967542																	-0.968	0.978424	0.023	0.278	0.563	0.741276	-2.1923	-0.023	-1	-0.967542	-1	-0.0324578	0	-0.967542	1.00156	0	0.0340136	0.978424	-0.967542	0.0108818	1	0.741276	0.237148
5	0.0872664	5		-0.0826863	-0.996195	-0.913508																	-0.914	0.889493	-0.011	0.227	0.508	0.680863	-2.03898	0.011	-1	-0.913508	-0.996195	-0.0826863	5	-0.913508	0.97598	5	0.0624716	0.889493	-0.913508	-1.803	2	0.680863	0.20863
10	0.174533	10		-0.127209	-0.984808	-0.857598																	-0.858	0.788931	-0.061	0.178	0.459	0.632083	-1.89336	0.061	-1	-0.857598	-0.984808	-0.127209	10	-0.857598	0.953592	10	0.0959932	0.788931	-0.857598	-1.64653	3	0.632083	0.156848
15	0.261799	15		-0.163862	-0.965926	-0.802064																	-0.802	0.691745	-0.107	0.132	0.414	0.586679	-1.75193	0.107	-1	-0.802064	-0.965926	-0.163862	15	-0.802064	0.93219	15	0.130126	0.691745	-0.802064	-1.49381	4	0.586679	0.105066
20	0.349066	20		-0.193539	-0.939693	-0.746154																	-0.746	0.599437	-0.149	0.09	0.374	0.546904	-1.61775	0.149	-1	-0.746154	-0.939693	-0.193539	20	-0.746154	0.915949	20	0.169795	0.599437	-0.746154	-1.34559	5	0.546904	0.0525328
25	0.436332	25		-0.215689	-0.906308	-0.690619																	-0.691	0.511257	-0.186	0.053	0.338	0.510882	-1.48951	0.186	-1	-0.690619	-0.906308	-0.215689	25	-0.690619	0.900467	25	0.209848	0.511257	-0.690619	-1.20188	6	0.510882	0.00037527
30	0.523598	30		-0.231316	-0.866026	-0.634709																	-0.635	0.42758	-0.218	0.019	0.308	0.429081	-1.3155	0.218	-1	-0.634709	-0.866026	-0.231316	30	-0.634709	0.890297	30	0.255588	0.42758	-0.634709	-1.06229	7	0.429081	-0.00150094
35	0.610865	35		-0.240353	-0.819152	-0.578799																	-0.579	0.346904	-0.244	-0.007	0.281	0.349531	-1.14455	0.244	-1	-0.578799	-0.819152	-0.240353	35	-0.578799	0.880811	35	0.302011	0.346904	-0.578799	-0.925704	8	0.349531	-0.00262666
40	0.698131	40		-0.243156	-0.766045	-0.522889																	-0.523	0.271482	-0.267	-0.032	0.26	0.275235	-0.980476	0.267	-1	-0.522889	-0.766045	-0.243156	40	-0.522889	0.876636	40	0.353747	0.271482	-0.522889	-0.794371	9	0.275235	-0.00375235
45	0.785397	45		-0.239753	-0.707107	-0.467355																	-0.467	0.199812	-0.285	-0.052	0.241	0.20394	-0.820534	0.285	-1	-0.467355	-0.707107	-0.239753	45	-0.467355	0.873145	45	0.405791	0.199812	-0.467355	-0.667167	10	0.20394	-0.00412758
50	0.872664	50		-0.230968	-0.642788	-0.41182																	-0.412	0.132645	-0.298	-0.067	0.178	0.138649	-0.671972	0.298	-1	-0.41182	-0.642788	-0.230968	50	-0.41182	0.876561	50	0.464741	0.132645	-0.41182	-0.544465	11	0.138649	-0.00600375
55	0.95993	55		-0.216917	-0.573577	-0.35666																	-0.357	0.0703565	-0.307	-0.076	0.115	0.0763602	-0.528601	0.307	-1	-0.35666	-0.573577	-0.216917	55	-0.35666	0.880583	55	0.523922	0.0703565	-0.35666	-0.427017	12	0.0763602	-0.00600376
60	1.0472	60		-0.198875	-0.500001	-0.301126																	-0.301	0.0121951	-0.311	-0.08	0.059	0.0200751	-0.391235	0.311	-1	-0.301126	-0.500001	-0.198875	60	-0.301126	0.890221	60	0.589096	0.0121951	-0.301126	-0.313321	13	0.0200751	-0.00787993
65	1.13446	65		-0.177028	-0.422619	-0.245591																	-0.246	-0.0395872	-0.31	-0.077	0.006	-0.0332083	-0.260498	0.31	-1	-0.245591	-0.422619	-0.177028	65	-0.245591	0.900391	65	0.6548	-0.0395872	-0.245591	-0.206004	14	-0.0332083	-0.00637899
70	1.22173	70		-0.151965	-0.342021	-0.190056																	-0.19	-0.0879925	-0.306	-0.071	-0.041	-0.0804878	-0.135703	0.306	-1	-0.190056	-0.342021	-0.151965	70	-0.190056	0.916101	70	0.726044	-0.0879925	-0.190056	-0.102064	15	-0.0804878	-0.0075047
75	1.309	75		-0.124299	-0.25882	-0.134522																	-0.135	-0.131144	-0.297	-0.06	-0.086	-0.124765	-0.0167873	0.297	-1	-0.134522	-0.25882	-0.124299	75	-0.134522	0.932721	75	0.7982	-0.131144	-0.134522	-0.00337711	16	-0.124765	-0.00637898
80	1.39626	80		-0.0946625	-0.173649	-0.0789869																	-0.079	-0.170544	-0.283	-0.045	-0.124	-0.163039	0.0964364	0.283	-1	-0.0789869	-0.173649	-0.0946625	80	-0.0789869	0.954502	80	0.875515	-0.170544	-0.0789869	0.0915572	17	-0.163039	-0.00750469
85	1.48353	85		-0.0637048	-0.087157	-0.0234522																	-0.023	-0.204315	-0.265	-0.026	-0.159	-0.198311	0.204532	0.265	-1	-0.0234522	-0.087157	-0.0637048	85	-0.0234522	0.977118	85	0.953666	-0.204315	-0.0234522	0.180863	18	-0.198311	-0.00600375
90	1.57079	90		-0.0320839	-1.32679e-06	0.0320826																	0.032	-0.234334	-0.242	-0.014	-0.189	-0.22758	0.306184	0.242	-1	0.0320826	-1.32679e-06	-0.0320839	90	0.0320826	1.00748	90	1.03956	-0.234334	0.0320826	0.266417	19	-0.22758	-0.00675422
95	1.65806	95		-0.000462912	0.0871543	0.0876173																	0.088	-0.259475	-0.211	-0.027	-0.215	-0.253846	0.408771	0.211	-1	0.0876173	0.0871543	-0.000462912	95	0.0876173	1.03692	95	1.12454	-0.259475	0.0876173	0.347092	20	-0.253846	-0.00562849
100	1.74533	100		0.0304948	0.173647	0.143152																	0.143	-0.280488	-0.176	-0.047	-0.235	-0.274109	0.50454	0.176	-1	0.143152	0.173647	0.0304948	100	0.143152	1.05923	100	1.20239	-0.280488	0.143152	0.42364	21	-0.274109	-0.00637898
105	1.83259	105		0.0605061	0.258818	0.198311																	0.198	-0.295497	-0.134	-0.061	-0.252	-0.29137	0.595493	0.134	-1	0.198311	0.258818	0.0605061	105	0.198311	1.07737	105	1.27568	-0.295497	0.198311	0.493809	22	-0.29137	-0.00412756
110	1.91986	110		0.0881724	0.342019	0.253846																	0.254	-0.309006	-0.091	-0.074	-0.264	-0.302627	0.681129	0.091	-1	0.253846	0.342019	0.0881724	110	0.253846	1.09422	110	1.34807	-0.309006	0.253846	0.562852	23	-0.302627	-0.00637898
115	2.00713	115		0.113611	0.422617	0.309006																	0.309	-0.316135	-0.04	-0.08	-0.272	-0.310882	0.760949	0.04	-1	0.309006	0.422617	0.113611	115	0.309006	1.1075	115	1.41651	-0.316135	0.309006	0.625141	24	-0.310882	-0.00525329
120	2.09439	120		0.135458	0.499998	0.36454																	0.365	-0.320263	0.011	-0.084	-0.274	-0.313133	0.83439	-0.011	-1	0.36454	0.499998	0.135458	120	0.36454	1.11638	120	1.48092	-0.320263	0.36454	0.684803	25	-0.313133	-0.00712946
125	2.18166	125		0.1535	0.573575	0.420075																	0.42	-0.321013	0.068	-0.082	-0.274	-0.312383	0.903014	-0.068	-1	0.420075	0.573575	0.1535	125	0.420075	1.1242	125	1.54427	-0.321013	0.420075	0.741088	26	-0.312383	-0.00863039
130	2.26893	130		0.166801	0.642786	0.475985																	0.476	-0.314259	0.131	-0.074	-0.268	-0.305629	0.964008	-0.131	-1	0.475985	0.642786	0.166801	130	0.475985	1.12837	130	1.60436	-0.314259	0.475985	0.790244	27	-0.305629	-0.00863039
135	2.35619	135		0.17521	0.707105	0.531895																	0.532	-0.304878	0.198	-0.064	-0.26	-0.295872	1.02156	-0.198	-1	0.531895	0.707105	0.17521	135	0.531895	1.12799	135	1.65989	-0.304878	0.531895	0.836773	28	-0.295872	-0.00900564
140	2.44346	140		0.178238	0.766043	0.587805																	0.588	-0.287993	0.269	-0.046	-0.243	-0.280113	1.06992	-0.269	-1	0.587805	0.766043	0.178238	140	0.587805	1.12678	140	1.71458	-0.287993	0.587805	0.875797	29	-0.280113	-0.00787995
145	2.53073	145		0.175436	0.819151	0.643715																	0.644	-0.269606	0.345	-0.022	-0.222	-0.261351	1.11528	-0.345	-1	0.643715	0.819151	0.175436	145	0.643715	1.12177	145	1.76548	-0.269606	0.643715	0.913321	30	-0.261351	-0.00825515
150	2.61799	150		0.1664	0.866024	0.699625																	0.7	-0.244841	0.425	0.005	-0.197	-0.236585	1.15232	-0.425	-1	0.699625	0.866024	0.1664	150	0.699625	1.11236	150	1.81198	-0.244841	0.699625	0.944465	31	-0.236585	-0.00825517
155	2.70526	155		0.150772	0.906307	0.755535																	0.756	-0.216698	0.511	0.038	-0.168	-0.210319	1.18717	-0.511	-1	0.755535	0.906307	0.150772	155	0.755535	1.10189	155	1.85742	-0.216698	0.755535	0.972233	32	-0.210319	-0.00637898
160	2.79252	160		0.128998	0.939692	0.810694																	0.811	-0.182176	0.602	0.075	-0.133	-0.174296	1.2092	-0.602	-1	0.810694	0.939692	0.128998	160	0.810694	1.08792	160	1.89862	-0.182176	0.810694	0.992871	33	-0.174296	-0.00787993
165	2.87979	165		0.0996963	0.965925	0.866229																	0.866	-0.146529	0.697	0.116	-0.094	-0.136773	1.22991	-0.697	-1	0.866229	0.965925	0.0996963	165	0.866229	1.06963	165	1.93586	-0.146529	0.866229	1.01276	34	-0.136773	-0.00975609
170	2.96706	170		0.0634189	0.984807	0.921388																	0.921	-0.103002	0.796	0.161	-0.049	-0.0924953	1.24081	-0.796	-1	0.921388	0.984807	0.0634189	170	0.921388	1.0502	170	1.97159	-0.103002	0.921388	1.02439	35	-0.0924953	-0.0105066
175	3.05432	175		0.0192714	0.996194	0.976923																	0.977	-0.0587242	0.899	0.21	-0.001	-0.0444653	1.24926	-0.899	-1	0.976923	0.996194	0.0192714	175	0.976923	1.02713	175	2.00405	-0.0587242	0.976923	1.03565	36	-0.0444653	-0.0142589
180	3.14159	180		0.0365854	1	0.963415																	0.963	-0.0125704	0.965	0.256	0.049	0.00243902	1.17916	-0.965	-1	0.963415	1	0.0365854	180	0.963415	1.00072	180	1.96414	-0.0125704	0.963415	0.975985	37	0.00243902	-0.0150094
185	3.22886	185		0.0845626	0.996195	0.911632																	0.912	-0.0515948	0.885	0.215	0.007	-0.0384615	1.17107	-0.885	-1	0.911632	0.996195	0.0845626	185	0.911632	1.02614	185	1.93778	-0.0515948	0.911632	0.963227	38	-0.0384615	-0.0131332
190	3.31612	190		0.128335	0.984808	0.856473																	0.856	-0.0988743	0.782	0.169	-0.04	-0.0849906	1.1623	-0.782	-1	0.856473	0.984808	0.128335	190	0.856473	1.04937	190	1.90584	-0.0988743	0.856473	0.955347	39	-0.0849906	-0.0138837
195	3.40339	195		0.164989	0.965927	0.800938																	0.801	-0.139775	0.682	0.125	-0.083	-0.127767	1.14834	-0.682	-1	0.800938	0.965927	0.164989	195	0.800938	1.06834	195	1.86928	-0.139775	0.800938	0.940713	40	-0.127767	-0.0120075
200	3.49066	200		0.19354	0.939694	0.746154																	0.746	-0.176548	0.588	0.087	-0.121	-0.16379	1.12663	-0.588	-1	0.746154	0.939694	0.19354	200	0.746154	1.08663	200	1.83279	-0.176548	0.746154	0.922702	41	-0.16379	-0.012758
205	3.57792	205		0.21569	0.906309	0.690619																	0.691	-0.209193	0.497	0.051	-0.154	-0.19531	1.09916	-0.497	-1	0.690619	0.906309	0.21569	205	0.690619	1.10067	205	1.79129	-0.209193	0.690619	0.899812	42	-0.19531	-0.0138837
210	3.66519	210		0.230567	0.866027	0.63546																	0.635	-0.236585	0.414	0.024	-0.181	-0.224578	1.06706	-0.414	-1	0.63546	0.866027	0.230567	210	0.63546	1.11061	210	1.74607	-0.236585	0.63546	0.872045	43	-0.224578	-0.0120075
215	3.75245	215		0.239229	0.819154	0.579925																	0.58	-0.261351	0.332	-0.003	-0.205	-0.249343	1.03058	-0.332	-1	0.579925	0.819154	0.239229	215	0.579925	1.11957	215	1.69949	-0.261351	0.579925	0.841276	44	-0.249343	-0.0120075
220	3.83972	220		0.240906	0.766047	0.525141																	0.525	-0.280863	0.258	-0.023	-0.223	-0.268856	0.987725	-0.258	-1	0.525141	0.766047	0.240906	220	0.525141	1.1245	220	1.64964	-0.280863	0.525141	0.806004	45	-0.268856	-0.0120075
225	3.92699	225		0.237503	0.707109	0.469606																	0.47	-0.298499	0.184	-0.043	-0.237	-0.285366	0.941178	-0.184	-1	0.469606	0.707109	0.237503	225	0.469606	1.12526	225	1.59487	-0.298499	0.469606	0.768105	46	-0.285366	-0.0131332
230	4.01425	230		0.227968	0.64279	0.414822																	0.415	-0.30863	0.118	-0.053	-0.248	-0.295122	0.885062	-0.118	-1	0.414822	0.64279	0.227968	230	0.414822	1.12526	230	1.54008	-0.30863	0.414822	0.723452	47	-0.295122	-0.0135085
235	4.10152	235		0.214292	0.573579	0.359287																	0.359	-0.314634	0.052	-0.062	-0.256	-0.302627	0.823694	-0.052	-1	0.359287	0.573579	0.214292	235	0.359287	1.12101	235	1.4803	-0.314634	0.359287	0.673921	48	-0.302627	-0.0120075
240	4.18879	240		0.1955	0.500003	0.304503																	0.305	-0.316135	-0.005	-0.061	-0.258	-0.304128	0.757445	0.005	-1	0.304503	0.500003	0.1955	240	0.304503	1.11281	240	1.41732	-0.316135	0.304503	0.620638	49	-0.304128	-0.0120075
245	4.27605	245		0.173653	0.422622	0.248968																	0.249	-0.314259	-0.06	-0.059	-0.256	-0.301876	0.684381	0.06	-1	0.248968	0.422622	0.173653	245	0.248968	1.10356	245	1.35252	-0.314259	0.248968	0.563227	50	-0.301876	-0.0123827
250	4.36332	250		0.14859	0.342024	0.193433																	0.193	-0.305629	-0.108	-0.05	-0.248	-0.294371	0.603936	0.108	-1	0.193433	0.342024	0.14859	250	0.193433	1.09035	250	1.28378	-0.305629	0.193433	0.499062	51	-0.294371	-0.011257
255	4.45059	255		0.120924	0.258823	0.137899																	0.138	-0.293246	-0.153	-0.037	-0.237	-0.283865	0.52005	0.153	-1	0.137899	0.258823	0.120924	255	0.137899	1.07312	255	1.21102	-0.293246	0.137899	0.431144	52	-0.283865	-0.00938087
260	4.53785	260		0.091288	0.173652	0.082364																	0.082	-0.277111	-0.192	-0.018	-0.22	-0.266604	0.427659	0.192	-1	0.082364	0.173652	0.091288	260	0.082364	1.05491	260	1.13727	-0.277111	0.082364	0.359475	53	-0.266604	-0.0105066
265	4.62512	265		0.0603304	0.0871596	0.0268293																	0.027	-0.255347	-0.226	0.005	-0.199	-0.246341	0.331453	0.226	-1	0.0268293	0.0871596	0.0603304	265	0.0268293	1.03252	265	1.05935	-0.255347	0.0268293	0.282176	54	-0.246341	-0.00900563
270	4.71238	270		0.0287094	3.98038e-06	-0.0287054																	-0.029	-0.228705	-0.255	0.016	-0.173	-0.220075	0.228865	0.255	-1	-0.0287054	3.98038e-06	0.0287094	270	-0.0287054	0.996395	270	0.96769	-0.228705	-0.0287054	0.2	55	-0.220075	-0.0086304
275	4.79965	275		-0.00291155	-0.0871517	-0.0842401																	-0.084	-0.198687	-0.278	-0.002	-0.144	-0.190807	0.1279	0.278	-1	-0.0842401	-0.0871517	-0.00291155	275	-0.0842401	0.97135	275	0.88711	-0.198687	-0.0842401	0.114447	56	-0.190807	-0.00787991
280	4.88692	280		-0.0338693	-0.173644	-0.139775																	-0.14	-0.16454	-0.295	-0.026	-0.109	-0.155535	0.0204924	0.295	-1	-0.139775	-0.173644	-0.0338693	280	-0.139775	0.949949	280	0.810174	-0.16454	-0.139775	0.0247655	57	-0.155535	-0.00900563
285	4.97418	285		-0.0635054	-0.258815	-0.19531																	-0.195	-0.125516	-0.307	-0.043	-0.072	-0.117261	-0.0908562	0.307	-1	-0.19531	-0.258815	-0.0635054	285	-0.19531	0.92923	285	0.733921	-0.125516	-0.19531	-0.0697936	58	-0.117261	-0.00825516
290	5.06145	290		-0.0907966	-0.342016	-0.25122																	-0.251	-0.0827392	-0.316	-0.057	-0.028	-0.0729831	-0.210272	0.316	-1	-0.25122	-0.342016	-0.0907966	290	-0.25122	0.913824	290	0.662604	-0.0827392	-0.25122	-0.16848	59	-0.0729831	-0.00975609
295	5.14872	295		-0.115485	-0.422614	-0.307129																	-0.307	-0.0350844	-0.32	-0.065	0.02	-0.0257036	-0.334379	0.32	-1	-0.307129	-0.422614	-0.115485	295	-0.307129	0.899101	295	0.591971	-0.0350844	-0.307129	-0.272045	60	-0.0257036	-0.00938087
300	5.23598	300		-0.136957	-0.499996	-0.363039																	-0.363	0.0159475	-0.322	-0.071	0.073	0.0275797	-0.465616	0.322	-1	-0.363039	-0.499996	-0.136957	300	-0.363039	0.889614	300	0.526575	0.0159475	-0.363039	-0.378987	61	0.0275797	-0.0116323
305	5.32325	305		-0.154999	-0.573573	-0.418574																	-0.419	0.0733584	-0.317	-0.068	0.129	0.0838649	-0.602232	0.317	-1	-0.418574	-0.573573	-0.154999	305	-0.418574	0.880962	305	0.462388	0.0733584	-0.418574	-0.491932	62	0.0838649	-0.0105066
310	5.41052	310		-0.168675	-0.642784	-0.474109																	-0.474	0.136398	-0.308	-0.062	0.192	0.146154	-0.745603	0.308	-1	-0.474109	-0.642784	-0.168675	310	-0.474109	0.877699	310	0.40359	0.136398	-0.474109	-0.610507	63	0.146154	-0.0097561
315	5.49778	315		-0.177835	-0.707103	-0.529268																	-0.529	0.200563	-0.295	-0.052	0.258	0.211445	-0.891851	0.295	-1	-0.529268	-0.707103	-0.177835	315	-0.529268	0.87527	315	0.346002	0.200563	-0.529268	-0.729831	64	0.211445	-0.0108818
320	5.58505	320		-0.181238	-0.766041	-0.584803																	-0.585	0.272233	-0.277	-0.036	0.273	0.282739	-1.05154	0.277	-1	-0.584803	-0.766041	-0.181238	320	-0.584803	0.877927	320	0.293124	0.272233	-0.584803	-0.857036	65	0.282739	-0.0105066
325	5.67232	325		-0.179187	-0.819149	-0.639962																	-0.64	0.34803	-0.255	-0.013	0.291	0.357036	-1.21499	0.255	-1	-0.639962	-0.819149	-0.179187	325	-0.639962	0.881569	325	0.241607	0.34803	-0.639962	-0.987993	66	0.357036	-0.00900561
330	5.75958	330		-0.170526	-0.866023	-0.695497																	-0.695	0.42833	-0.229	0.013	0.315	0.438086	-1.38644	0.229	-1	-0.695497	-0.866023	-0.170526	330	-0.695497	0.890373	330	0.194876	0.42833	-0.695497	-1.12383	67	0.438086	-0.00975609
335	5.84685	335		-0.156024	-0.906306	-0.750281																	-0.75	0.512007	-0.198	0.046	0.342	0.522139	-1.56202	0.198	-1	-0.750281	-0.906306	-0.156024	335	-0.750281	0.899935	335	0.149654	0.512007	-0.750281	-1.26229	68	0.522139	-0.0101314
340	5.93411	340		-0.133875	-0.939691	-0.805816																	-0.806	0.599437	-0.163	0.081	0.377	0.555159	-1.68819	0.163	-1	-0.805816	-0.939691	-0.133875	340	-0.805816	0.914886	340	0.10907	0.599437	-0.805816	-1.40525	69	0.555159	0.0442777
345	6.02138	345		-0.105324	-0.965925	-0.8606																	-0.861	0.692495	-0.123	0.123	0.414	0.590432	-1.81793	0.123	-1	-0.8606	-0.965925	-0.105324	345	-0.8606	0.930596	345	0.0699958	0.692495	-0.8606	-1.5531	70	0.590432	0.102064
350	6.10865	350		-0.0686718	-0.984807	-0.916135																	-0.916	0.788555	-0.079	0.166	0.458	0.632833	-1.95499	0.079	-1	-0.916135	-0.984807	-0.0686718	350	-0.916135	0.951542	350	0.0354074	0.788555	-0.916135	-1.70469	71	0.632833	0.155722
355	6.19591	355		-0.0252749	-0.996194	-0.970919																	-0.971	0.889493	-0.03	0.216	0.505	0.678612	-2.0973	0.03	-1	-0.970919	-0.996194	-0.0252749	355	-0.970919	0.973248	355	0.00232852	0.889493	-0.970919	-1.86041	72	0.678612	0.210882
360	6.28318	360		-0.0369606	-1	-0.963039																	-0.963	0.962289	0.021	0.265	0.556	0.730019	-2.16729	-0.021	-1	-0.963039	-1	-0.0369606	360	-0.963039	0.99981	360	0.0367709	0.962289	-0.963039	-1.92533	73	0.730019	0.23227

## Sheet: sin(2x)
																-cos(x)+abs(x-pi)/(pi/2)-1
	RADIANS	DEGREES	A*SIN(2X)		RADIANS	DEGREES	-COSINE	DEGREES	sim -COS										c0s					c0s	dif			sin	sim fm				jan
	0	0	0		0	0	-1	0	-0.983712	0.0162883		0	0.0162883		0	-1	0		-1	-1		0	-0.983712	-1	0.0162883		0	0	0.0135088	-0.0135088		0	0	0
	0.0872664	5	-0.043412		0.0872664	5	-0.996195	5	-0.987506	0.00868842		5	0.00868842		5	-0.944444	5	-0.944444	-0.996195	-0.0517503		5	-0.987506	-0.996195	0.00868842		5	-0.043412	-0.044928	0.00151603		5	-0.0646878	0.0872664
	0.174533	10	-0.085505		0.174533	10	-0.984808	10	-0.978551	0.00625675		10	0.00625675		10	-0.888889	10	-0.888889	-0.984808	-0.0959189		10	-0.978551	-0.984808	0.00625675		10	-0.085505	-0.090615	0.00511004		10	-0.119899	0.174533
	0.261799	15	-0.125		0.261799	15	-0.965926	15	-0.963524	0.00240146		15	0.00240146		15	-0.833333	15	-0.833333	-0.965926	-0.132593		15	-0.963524	-0.965926	0.00240146		15	-0.125	-0.130231	0.00523072		15	-0.165741	0.261799
	0.349066	20	-0.160697		0.349066	20	-0.939693	20	-0.942426	-0.00273373		20	-0.00273373		20	-0.777778	20	-0.777778	-0.939693	-0.161915		20	-0.942426	-0.939693	-0.00273374		20	-0.160697	-0.163775	0.00307808		20	-0.202394	0.349066
	0.436332	25	-0.191511		0.436332	25	-0.906308	25	-0.915181	-0.0088733		25	-0.0088733		25	-0.722222	25	-0.722222	-0.906308	-0.184086		25	-0.915181	-0.906308	-0.0088733		25	-0.191511	-0.191172	-0.000339122		25	-0.230107	0.436332
	0.523598	30	-0.216506		0.523598	30	-0.866026	30	-0.881789	-0.0157631		30	-0.0157631		30	-0.666667	30	-0.666667	-0.866026	-0.199359		30	-0.881789	-0.866026	-0.0157631		30	-0.216506	-0.212422	-0.00408462		30	-0.249199	0.523598
	0.610865	35	-0.234923		0.610865	35	-0.819152	35	-0.842325	-0.0231726		35	-0.0231726		35	-0.611111	35	-0.611111	-0.819152	-0.208041		35	-0.842325	-0.819152	-0.0231726		35	-0.234923	-0.2276	-0.00732306		35	-0.260052	0.610865
	0.698131	40	-0.246202		0.698131	40	-0.766045	40	-0.79679	-0.0307449		40	-0.0307449		40	-0.555556	40	-0.555556	-0.766045	-0.210489		40	-0.79679	-0.766045	-0.0307449		40	-0.246202	-0.236707	-0.00949484		40	-0.263112	0.698131
	0.785397	45	-0.25		0.785397	45	-0.707107	45	-0.745164	-0.038057		45	-0.038057		45	-0.5	45	-0.5	-0.707107	-0.207107		45	-0.745164	-0.707107	-0.038057		45	-0.25	-0.239724	-0.0102762		45	-0.258884	0.785397
	0.872664	50	-0.246202		0.872664	50	-0.642788	50	-0.688245	-0.0454571		50	-0.0454571		50	-0.444444	50	-0.444444	-0.642788	-0.198344		50	-0.688245	-0.642788	-0.0454571		50	-0.246202	-0.237447	-0.00875501		50	-0.24793	0.872664
	0.95993	55	-0.234923		0.95993	55	-0.573577	55	-0.625255	-0.0516778		55	-0.0516778		55	-0.388889	55	-0.388889	-0.573577	-0.184688		55	-0.625255	-0.573577	-0.0516778		55	-0.234923	-0.229099	-0.00582441		55	-0.23086	0.95993
	1.0472	60	-0.216507		1.0472	60	-0.500001	60	-0.556193	-0.0561925		60	-0.0561925		60	-0.333333	60	-0.333333	-0.500001	-0.166667		60	-0.556193	-0.500001	-0.0561925		60	-0.216507	-0.214679	-0.00182717		60	-0.208334	1.0472
	1.13446	65	-0.191511		1.13446	65	-0.422619	65	-0.48106	-0.0584411		65	-0.0584411		65	-0.277778	65	-0.277778	-0.422619	-0.144841		65	-0.48106	-0.422619	-0.0584411		65	-0.191511	-0.194189	0.00267715		65	-0.181052	1.13446
	1.22173	70	-0.160697		1.22173	70	-0.342021	70	-0.399799	-0.0577778		70	-0.0577778		70	-0.222222	70	-0.222222	-0.342021	-0.119799		70	-0.399799	-0.342021	-0.0577778		70	-0.160697	-0.167569	0.00687216		70	-0.149749	1.22173
	1.309	75	-0.125		1.309	75	-0.25882	75	-0.312371	-0.0535512		75	-0.0535512		75	-0.166667	75	-0.166667	-0.25882	-0.0921534		75	-0.312371	-0.25882	-0.0535512		75	-0.125	-0.134784	0.00978365		75	-0.115192	1.309
	1.39626	80	-0.0855056		1.39626	80	-0.173649	80	-0.218872	-0.0452231		80	-0.0452231		80	-0.111111	80	-0.111111	-0.173649	-0.0625382		80	-0.218872	-0.173649	-0.0452231		80	-0.0855056	-0.0959274	0.0104219		80	-0.0781728	1.39626
	1.48353	85	-0.0434127		1.48353	85	-0.087157	85	-0.119302	-0.0321452		85	-0.0321452		85	-0.0555556	85	-0.0555556	-0.087157	-0.0316014		85	-0.119302	-0.087157	-0.0321452		85	-0.0434127	-0.0509994	0.00758674		85	-0.0395018	1.48353
	1.57079	90	-6.63397e-07		1.57079	90	-1.32679e-06	90	0.0273401	0.0273414		90	0.0273414		90	0	90	0	-1.32679e-06	-1.32679e-06		90	0.0273401	-1.32679e-06	0.0273414		90	-6.63397e-07	0.0136795	-0.0136802		90	-1.65849e-06	1.57079
	1.65806	95	0.0434114		1.65806	95	0.0871543	95	0.13283	0.0456756		95	0.0456756		95	0.0555556	95	0.0555556	0.0871543	0.0315988		95	0.13283	0.0871543	0.0456756		95	0.0434114	0.0645272	-0.0211158		95	0.0394985	1.65806
	1.74533	100	0.0855043		1.74533	100	0.173647	100	0.232248	0.0586017		100	0.0586017		100	0.111111	100	0.111111	0.173647	0.0625356		100	0.232248	0.173647	0.0586017		100	0.0855043	0.109303	-0.0237991		100	0.0781695	1.74533
	1.83259	105	0.124999		1.83259	105	0.258818	105	0.325596	0.066778		105	0.066778		105	0.166667	105	0.166667	0.258818	0.0921509		105	0.325596	0.258818	0.066778		105	0.124999	0.148008	-0.023009		105	0.115189	1.83259
	1.91986	110	0.160696		1.91986	110	0.342019	110	0.412871	0.0708527		110	0.0708527		110	0.222222	110	0.222222	0.342019	0.119796		110	0.412871	0.342019	0.0708527		110	0.160696	0.180642	-0.0199456		110	0.149745	1.91986
	2.00713	115	0.191511		2.00713	115	0.422617	115	0.493981	0.0713641		115	0.0713641		115	0.277778	115	0.277778	0.422617	0.144839		115	0.493981	0.422617	0.0713641		115	0.191511	0.207109	-0.0155986		115	0.181049	2.00713
	2.09439	120	0.216506		2.09439	120	0.499998	120	0.568962	0.0689636		120	0.0689636		120	0.333333	120	0.333333	0.499998	0.166665		120	0.568962	0.499998	0.0689636		120	0.216506	0.227448	-0.0109423		120	0.208331	2.09439
	2.18166	125	0.234923		2.18166	125	0.573575	125	0.637872	0.0642971		125	0.0642971		125	0.388889	125	0.388889	0.573575	0.184686		125	0.637872	0.573575	0.0642971		125	0.234923	0.241716	-0.00679308		125	0.230858	2.18166
	2.26893	130	0.246202		2.26893	130	0.642786	130	0.700711	0.0579244		130	0.0579244		130	0.444444	130	0.444444	0.642786	0.198342		130	0.700711	0.642786	0.0579244		130	0.246202	0.249912	-0.00371048		130	0.247927	2.26893
	2.35619	135	0.25		2.35619	135	0.707105	135	0.757497	0.0503913		135	0.0503913		135	0.5	135	0.5	0.707105	0.207105		135	0.757497	0.707105	0.0503913		135	0.25	0.252056	-0.0020562		135	0.258882	2.35619
	2.44346	140	0.246202		2.44346	140	0.766043	140	0.809255	0.0432119		140	0.0432119		140	0.555556	140	0.555556	0.766043	0.210488		140	0.809255	0.766043	0.0432119		140	0.246202	0.249172	-0.00297018		140	0.263109	2.44346
	2.53073	145	0.234924		2.53073	145	0.819151	145	0.854942	0.0357912		145	0.0357912		145	0.611111	145	0.611111	0.819151	0.20804		145	0.854942	0.819151	0.0357912		145	0.234924	0.240217	-0.00529353		145	0.26005	2.53073
	2.61799	150	0.216507		2.61799	150	0.866024	150	0.894558	0.0285333		150	0.0285333		150	0.666667	150	0.666667	0.866024	0.199358		150	0.894558	0.866024	0.0285333		150	0.216507	0.22519	-0.00868354		150	0.249197	2.61799
	2.70526	155	0.191512		2.70526	155	0.906307	155	0.928102	0.021795		155	0.021795		155	0.722222	155	0.722222	0.906307	0.184085		155	0.928102	0.906307	0.021795		155	0.191512	0.204092	-0.0125806		155	0.230106	2.70526
	2.79252	160	0.160698		2.79252	160	0.939692	160	0.955499	0.015807		160	0.015807		160	0.777778	160	0.777778	0.939692	0.161914		160	0.955499	0.939692	0.015807		160	0.160698	0.176847	-0.0161495		160	0.202393	2.79252
	2.87979	165	0.125001		2.87979	165	0.965925	165	0.976749	0.0108234		165	0.0108234		165	0.833333	165	0.833333	0.965925	0.132592		165	0.976749	0.965925	0.0108234		165	0.125001	0.143455	-0.0184537		165	0.16574	2.87979
	2.96706	170	0.0855062		2.96706	170	0.984807	170	0.991927	0.00711967		170	0.00711967		170	0.888889	170	0.888889	0.984807	0.0959184		170	0.991927	0.984807	0.00711967		170	0.0855062	0.103991	-0.0184848		170	0.119898	2.96706
	3.05432	175	0.0434133		3.05432	175	0.996194	175	1.00103	0.00483955		175	0.00483955		175	0.944444	175	0.944444	0.996194	0.05175		175	1.00103	0.996194	0.00483956		175	0.0434133	0.0584558	-0.0150425		175	0.0646875	3.05432
	3.14159	180	1.32679e-06		3.14159	180	1	180	1.00409	0.00408868		180	0.00408868		180	1	180	1	1	-3.52074e-12		180	1.00409	1	0.00408868		180	1.32679e-06	0.00686822	-0.00686689		180	-4.40092e-12	3.14159
	3.22886	185	0.0434107		3.22886	185	0.996195	185	1.0012	0.00500985		185	0.00500985		185	0.944444	185	0.944444	0.996195	0.0517505		185	1.0012	0.996195	0.00500984		185	0.0434107	0.0586265	-0.0152158		185	0.0646881	3.22886
	3.31612	190	0.0855037		3.31612	190	0.984808	190	0.99225	0.00744129		190	0.00744129		190	0.888889	190	0.888889	0.984808	0.0959194		190	0.99225	0.984808	0.00744129		190	0.0855037	0.104314	-0.0188098		190	0.119899	3.31612
	3.40339	195	0.124999		3.40339	195	0.965927	195	0.977223	0.0112964		195	0.0112964		195	0.833333	195	0.833333	0.965927	0.132593		195	0.977223	0.965927	0.0112963		195	0.124999	0.143929	-0.0189304		195	0.165742	3.40339
	3.49066	200	0.160696		3.49066	200	0.939694	200	0.956125	0.0164313		200	0.0164313		200	0.777778	200	0.777778	0.939694	0.161916		200	0.956125	0.939694	0.0164313		200	0.160696	0.177473	-0.0167776		200	0.202395	3.49066
	3.57792	205	0.19151		3.57792	205	0.906309	205	0.92888	0.0225707		205	0.0225707		205	0.722222	205	0.722222	0.906309	0.184087		205	0.92888	0.906309	0.0225707		205	0.19151	0.20487	-0.0133602		205	0.230109	3.57792
	3.66519	210	0.216506		3.66519	210	0.866027	210	0.895487	0.0294603		210	0.0294603		210	0.666667	210	0.666667	0.866027	0.19936		210	0.895487	0.866027	0.0294603		210	0.216506	0.22612	-0.00961454		210	0.2492	3.66519
	3.75245	215	0.234923		3.75245	215	0.819154	215	0.856023	0.0368696		215	0.0368696		215	0.611111	215	0.611111	0.819154	0.208043		215	0.856023	0.819154	0.0368696		215	0.234923	0.241299	-0.0063759		215	0.260053	3.75245
	3.83972	220	0.246202		3.83972	220	0.766047	220	0.810488	0.0444417		220	0.0444417		220	0.555556	220	0.555556	0.766047	0.210491		220	0.810488	0.766047	0.0444417		220	0.246202	0.250406	-0.00420389		220	0.263114	3.83972
	3.92699	225	0.25		3.92699	225	0.707109	225	0.758863	0.0517536		225	0.0517536		225	0.5	225	0.5	0.707109	0.207109		225	0.758863	0.707109	0.0517536		225	0.25	0.253422	-0.00342225		225	0.258886	3.92699
	4.01425	230	0.246202		4.01425	230	0.64279	230	0.701944	0.0591536		230	0.0591536		230	0.444444	230	0.444444	0.64279	0.198346		230	0.701944	0.64279	0.0591536		230	0.246202	0.251145	-0.00494326		230	0.247932	4.01425
	4.10152	235	0.234924		4.10152	235	0.573579	235	0.638953	0.0653742		235	0.0653742		235	0.388889	235	0.388889	0.573579	0.18469		235	0.638953	0.573579	0.0653742		235	0.234924	0.242797	-0.00787363		235	0.230863	4.10152
	4.18879	240	0.216507		4.18879	240	0.500003	240	0.569892	0.0698887		240	0.0698887		240	0.333333	240	0.333333	0.500003	0.16667		240	0.569892	0.500003	0.0698887		240	0.216507	0.228378	-0.0118707		240	0.208337	4.18879
	4.27605	245	0.191512		4.27605	245	0.422622	245	0.494759	0.0721372		245	0.0721372		245	0.277778	245	0.277778	0.422622	0.144844		245	0.494759	0.422622	0.0721372		245	0.191512	0.207887	-0.0163748		245	0.181055	4.27605
	4.36332	250	0.160698		4.36332	250	0.342024	250	0.413497	0.0714738		250	0.0714738		250	0.222222	250	0.222222	0.342024	0.119801		250	0.413497	0.342024	0.0714738		250	0.160698	0.181268	-0.0205697		250	0.149752	4.36332
	4.45059	255	0.125002		4.45059	255	0.258823	255	0.32607	0.0672472		255	0.0672472		255	0.166667	255	0.166667	0.258823	0.092156		255	0.32607	0.258823	0.0672472		255	0.125002	0.148483	-0.023481		255	0.115195	4.45059
	4.53785	260	0.0855068		4.53785	260	0.173652	260	0.232571	0.058919		260	0.058919		260	0.111111	260	0.111111	0.173652	0.0625408		260	0.232571	0.173652	0.058919		260	0.0855068	0.109626	-0.0241191		260	0.0781761	4.53785
	4.62512	265	0.043414		4.62512	265	0.0871596	265	0.133001	0.045841		265	0.045841		265	0.0555556	265	0.0555556	0.0871596	0.0316041		265	0.133001	0.0871596	0.045841		265	0.043414	0.0646979	-0.0212839		265	0.0395051	4.62512
	4.71238	270	1.99019e-06		4.71238	270	3.98038e-06	270	-0.0136416	-0.0136456		270	-0.0136456		270	0	270	0	3.98038e-06	3.98038e-06		270	-0.0136416	3.98038e-06	-0.0136456		270	1.99019e-06	1.897e-05	-1.69798e-05		270	4.97548e-06	4.71238
	4.79965	275	-0.04341		4.79965	275	-0.0871517	275	-0.119131	-0.0319797		275	-0.0319797		275	-0.0555556	275	-0.0555556	-0.0871517	-0.0315961		275	-0.119131	-0.0871517	-0.0319797		275	-0.04341	-0.0508287	0.0074186		275	-0.0394952	4.79965
	4.88692	280	-0.0855031		4.88692	280	-0.173644	280	-0.21855	-0.0449058		280	-0.0449058		280	-0.111111	280	-0.111111	-0.173644	-0.062533		280	-0.21855	-0.173644	-0.0449058		280	-0.0855031	-0.0956049	0.0101018		280	-0.0781663	4.88692
	4.97418	285	-0.124998		4.97418	285	-0.258815	285	-0.311897	-0.053082		285	-0.053082		285	-0.166667	285	-0.166667	-0.258815	-0.0921483		285	-0.311897	-0.258815	-0.053082		285	-0.124998	-0.13431	0.00931163		285	-0.115185	4.97418
	5.06145	290	-0.160695		5.06145	290	-0.342016	290	-0.399173	-0.0571567		290	-0.0571567		290	-0.222222	290	-0.222222	-0.342016	-0.119794		290	-0.399173	-0.342016	-0.0571567		290	-0.160695	-0.166943	0.0062481		290	-0.149742	5.06145
	5.14872	295	-0.19151		5.14872	295	-0.422614	295	-0.480282	-0.057668		295	-0.057668		295	-0.277778	295	-0.277778	-0.422614	-0.144837		295	-0.480282	-0.422614	-0.057668		295	-0.19151	-0.193411	0.00190097		295	-0.181046	5.14872
	5.23598	300	-0.216505		5.23598	300	-0.499996	300	-0.555264	-0.0552674		300	-0.0552674		300	-0.333333	300	-0.333333	-0.499996	-0.166663		300	-0.555264	-0.499996	-0.0552674		300	-0.216505	-0.21375	-0.00275552		300	-0.208329	5.23598
	5.32325	305	-0.234922		5.32325	305	-0.573573	305	-0.624173	-0.0506007		305	-0.0506007		305	-0.388889	305	-0.388889	-0.573573	-0.184684		305	-0.624173	-0.573573	-0.0506007		305	-0.234922	-0.228017	-0.00690497		305	-0.230855	5.32325
	5.41052	310	-0.246202		5.41052	310	-0.642784	310	-0.687012	-0.0442279		310	-0.0442279		310	-0.444444	310	-0.444444	-0.642784	-0.19834		310	-0.687012	-0.642784	-0.0442279		310	-0.246202	-0.236214	-0.00998779		310	-0.247925	5.41052
	5.49778	315	-0.25		5.49778	315	-0.707103	315	-0.743798	-0.0366947		315	-0.0366947		315	-0.5	315	-0.5	-0.707103	-0.207103		315	-0.743798	-0.707103	-0.0366947		315	-0.25	-0.238358	-0.0116423		315	-0.258879	5.49778
	5.58505	320	-0.246202		5.58505	320	-0.766041	320	-0.795557	-0.0295151		320	-0.0295151		320	-0.555556	320	-0.555556	-0.766041	-0.210486		320	-0.795557	-0.766041	-0.0295151		320	-0.246202	-0.235474	-0.0107285		320	-0.263107	5.58505
	5.67232	325	-0.234924		5.67232	325	-0.819149	325	-0.841243	-0.0220942		325	-0.0220942		325	-0.611111	325	-0.611111	-0.819149	-0.208038		325	-0.841243	-0.819149	-0.0220942		325	-0.234924	-0.226519	-0.00840542		325	-0.260048	5.67232
	5.75958	330	-0.216508		5.75958	330	-0.866023	330	-0.880859	-0.0148361		330	-0.0148361		330	-0.666667	330	-0.666667	-0.866023	-0.199356		330	-0.880859	-0.866023	-0.0148361		330	-0.216508	-0.211492	-0.00501563		330	-0.249195	5.75958
	5.84685	335	-0.191513		5.84685	335	-0.906306	335	-0.914403	-0.00809765		335	-0.00809765		335	-0.722222	335	-0.722222	-0.906306	-0.184083		335	-0.914403	-0.906306	-0.00809765		335	-0.191513	-0.190394	-0.00111873		335	-0.230104	5.84685
	5.93411	340	-0.160699		5.93411	340	-0.939691	340	-0.9418	-0.00210944		340	-0.00210944		340	-0.777778	340	-0.777778	-0.939691	-0.161913		340	-0.9418	-0.939691	-0.00210944		340	-0.160699	-0.163149	0.00244994		340	-0.202391	5.93411
	6.02138	345	-0.125002		6.02138	345	-0.965925	345	-0.96305	0.00287441		345	0.00287441		345	-0.833333	345	-0.833333	-0.965925	-0.132591		345	-0.96305	-0.965925	0.00287441		345	-0.125002	-0.129756	0.00475409		345	-0.165739	6.02138
	6.10865	350	-0.0855075		6.10865	350	-0.984807	350	-0.978228	0.00657837		350	0.00657837		350	-0.888889	350	-0.888889	-0.984807	-0.095918		350	-0.978228	-0.984807	0.00657837		350	-0.0855075	-0.0902925	0.00478501		350	-0.119897	6.10865
	6.19591	355	-0.0434146		6.19591	355	-0.996194	355	-0.987336	0.00885871		355	0.00885871		355	-0.944444	355	-0.944444	-0.996194	-0.0517498		355	-0.987336	-0.996194	0.00885871		355	-0.0434146	-0.0447573	0.00134267		355	-0.0646872	6.19591
	6.28318	360	-2.65359e-06		6.28318	360	-1	360	-0.99039	0.00960982		360	0.00960982		360		360	-1	-1	1.40831e-11		360	-0.99039	-1	0.00960982		360	-2.65359e-06	0.00683028	-0.00683293		360	1.76037e-11	6.28318
																	real MF			jan	si										INVERT	SIN	Inv + sin	cos	diff
														sin	cos	INVERT	Cos-INV		0	0			SIN +INV	SIN	INVERT	janivert	cos	jan		0	-1	0	-1	-1	0
													0	0	-1	-1	0		5	-0.0646878	0	0	-1	0	-1	-1	-1	0		5	-0.944444	-0.0646878	-1.00913	-0.996195	-0.0129376
													-0.0129376	-0.0646878	-0.996195	-0.944444	-0.0517503	-0.0517503	10	-0.119899	5	-0.0129376	-1.00913	-0.0646878	-0.944444	-1.06088	-0.996195	-0.0646878		10	-0.888889	-0.119899	-1.00879	-0.984808	-0.0239797
													-0.0239797	-0.119899	-0.984808	-0.888889	-0.0959189	-0.0959189	15	-0.165741	10	-0.0239797	-1.00879	-0.119899	-0.888889	-1.10471	-0.984808	-0.119899		15	-0.833333	-0.165741	-0.999074	-0.965926	-0.0331481
													-0.0331481	-0.165741	-0.965926	-0.833333	-0.132593	-0.132593	20	-0.202394	15	-0.0331481	-0.999074	-0.165741	-0.833333	-1.13167	-0.965926	-0.165741		20	-0.777778	-0.202394	-0.980171	-0.939693	-0.0404787
													-0.0404787	-0.202394	-0.939693	-0.777778	-0.161915	-0.161915	25	-0.230107	20	-0.0404787	-0.980171	-0.202394	-0.777778	-1.14209	-0.939693	-0.202394		25	-0.722222	-0.230107	-0.952329	-0.906308	-0.0460214
													-0.0460214	-0.230107	-0.906308	-0.722222	-0.184086	-0.184086	30	-0.249199	25	-0.0460214	-0.952329	-0.230107	-0.722222	-1.13642	-0.906308	-0.230107		30	-0.666667	-0.249199	-0.915865	-0.866026	-0.0498397
													-0.0498397	-0.249199	-0.866026	-0.666667	-0.199359	-0.199359	35	-0.260052	30	-0.0498397	-0.915865	-0.249199	-0.666667	-1.11522	-0.866026	-0.249199		35	-0.611111	-0.260052	-0.871163	-0.819152	-0.0520103
													-0.0520103	-0.260052	-0.819152	-0.611111	-0.208041	-0.208041	40	-0.263112	35	-0.0520103	-0.871163	-0.260052	-0.611111	-1.0792	-0.819152	-0.260052		40	-0.555556	-0.263112	-0.818667	-0.766045	-0.0526223
													-0.0526223	-0.263112	-0.766045	-0.555556	-0.210489	-0.210489	45	-0.258884	40	-0.0526223	-0.818667	-0.263112	-0.555556	-1.02916	-0.766045	-0.263112		45	-0.5	-0.258884	-0.758884	-0.707107	-0.0517768
													-0.0517768	-0.258884	-0.707107	-0.5	-0.207107	-0.207107	50	-0.24793	45	-0.0517768	-0.758884	-0.258884	-0.5	-0.965991	-0.707107	-0.258884		50	-0.444444	-0.24793	-0.692374	-0.642788	-0.0495859
													-0.0495859	-0.24793	-0.642788	-0.444444	-0.198344	-0.198344	55	-0.23086	50	-0.0495859	-0.692374	-0.24793	-0.444444	-0.890718	-0.642788	-0.24793		55	-0.388889	-0.23086	-0.619749	-0.573577	-0.0461721
													-0.0461721	-0.23086	-0.573577	-0.388889	-0.184688	-0.184688	60	-0.208334	55	-0.0461721	-0.619749	-0.23086	-0.388889	-0.804437	-0.573577	-0.23086		60	-0.333333	-0.208334	-0.541668	-0.500001	-0.0416669
													-0.0416669	-0.208334	-0.500001	-0.333333	-0.166667	-0.166667	65	-0.181052	60	-0.0416669	-0.541668	-0.208334	-0.333333	-0.708335	-0.500001	-0.208334		65	-0.277778	-0.181052	-0.458829	-0.422619	-0.0362103
													-0.0362103	-0.181052	-0.422619	-0.277778	-0.144841	-0.144841	70	-0.149749	65	-0.0362103	-0.458829	-0.181052	-0.277778	-0.603671	-0.422619	-0.181052		70	-0.222222	-0.149749	-0.371971	-0.342021	-0.0299497
													-0.0299497	-0.149749	-0.342021	-0.222222	-0.119799	-0.119799	75	-0.115192	70	-0.0299497	-0.371971	-0.149749	-0.222222	-0.49177	-0.342021	-0.149749		75	-0.166667	-0.115192	-0.281858	-0.25882	-0.0230384
													-0.0230384	-0.115192	-0.25882	-0.166667	-0.0921534	-0.0921534	80	-0.0781728	75	-0.0230384	-0.281858	-0.115192	-0.166667	-0.374012	-0.25882	-0.115192		80	-0.111111	-0.0781728	-0.189284	-0.173649	-0.0156346
													-0.0156346	-0.0781728	-0.173649	-0.111111	-0.0625382	-0.0625382	85	-0.0395018	80	-0.0156346	-0.189284	-0.0781728	-0.111111	-0.251822	-0.173649	-0.0781728		85	-0.0555556	-0.0395018	-0.0950574	-0.087157	-0.00790036
													-0.00790036	-0.0395018	-0.087157	-0.0555556	-0.0316014	-0.0316014	90	-1.65849e-06	85	-0.00790036	-0.0950574	-0.0395018	-0.0555556	-0.126659	-0.087157	-0.0395018		90	0	-1.65849e-06	-1.65849e-06	-1.32679e-06	-3.31704e-07
													-3.31704e-07	-1.65849e-06	-1.32679e-06	0	-1.32679e-06	-1.32679e-06	95	0.0394985	90	-3.31704e-07	-1.65849e-06	-1.65849e-06	0	-2.98528e-06	-1.32679e-06	-1.65849e-06		95	0.0555556	0.0394985	0.095054	0.0871543	0.0078997
													0.0078997	0.0394985	0.0871543	0.0555556	0.0315988	0.0315988	100	0.0781695	95	0.0078997	0.095054	0.0394985	0.0555556	0.126653	0.0871543	0.0394985		100	0.111111	0.0781695	0.189281	0.173647	0.0156339
													0.0156339	0.0781695	0.173647	0.111111	0.0625356	0.0625356	105	0.115189	100	0.0156339	0.189281	0.0781695	0.111111	0.251816	0.173647	0.0781695		105	0.166667	0.115189	0.281855	0.258818	0.0230377
													0.0230377	0.115189	0.258818	0.166667	0.0921509	0.0921509	110	0.149745	105	0.0230377	0.281855	0.115189	0.166667	0.374006	0.258818	0.115189		110	0.222222	0.149745	0.371968	0.342019	0.0299491
													0.0299491	0.149745	0.342019	0.222222	0.119796	0.119796	115	0.181049	110	0.0299491	0.371968	0.149745	0.222222	0.491764	0.342019	0.149745		115	0.277778	0.181049	0.458826	0.422617	0.0362097
													0.0362097	0.181049	0.422617	0.277778	0.144839	0.144839	120	0.208331	115	0.0362097	0.458826	0.181049	0.277778	0.603665	0.422617	0.181049		120	0.333333	0.208331	0.541665	0.499998	0.0416663
													0.0416663	0.208331	0.499998	0.333333	0.166665	0.166665	125	0.230858	120	0.0416663	0.541665	0.208331	0.333333	0.70833	0.499998	0.208331		125	0.388889	0.230858	0.619746	0.573575	0.0461715
													0.0461715	0.230858	0.573575	0.388889	0.184686	0.184686	130	0.247927	125	0.0461715	0.619746	0.230858	0.388889	0.804432	0.573575	0.230858		130	0.444444	0.247927	0.692372	0.642786	0.0495854
													0.0495854	0.247927	0.642786	0.444444	0.198342	0.198342	135	0.258882	130	0.0495854	0.692372	0.247927	0.444444	0.890713	0.642786	0.247927		135	0.5	0.258882	0.758882	0.707105	0.0517763
													0.0517763	0.258882	0.707105	0.5	0.207105	0.207105	140	0.263109	135	0.0517763	0.758882	0.258882	0.5	0.965987	0.707105	0.258882		140	0.555556	0.263109	0.818665	0.766043	0.0526219
													0.0526219	0.263109	0.766043	0.555556	0.210488	0.210488	145	0.26005	140	0.0526219	0.818665	0.263109	0.555556	1.02915	0.766043	0.263109		145	0.611111	0.26005	0.871161	0.819151	0.0520099
													0.0520099	0.26005	0.819151	0.611111	0.20804	0.20804	150	0.249197	145	0.0520099	0.871161	0.26005	0.611111	1.0792	0.819151	0.26005		150	0.666667	0.249197	0.915864	0.866024	0.0498394
													0.0498394	0.249197	0.866024	0.666667	0.199358	0.199358	155	0.230106	150	0.0498394	0.915864	0.249197	0.666667	1.11522	0.866024	0.249197		155	0.722222	0.230106	0.952328	0.906307	0.0460211
													0.0460211	0.230106	0.906307	0.722222	0.184085	0.184085	160	0.202393	155	0.0460211	0.952328	0.230106	0.722222	1.13641	0.906307	0.230106		160	0.777778	0.202393	0.98017	0.939692	0.0404785
													0.0404785	0.202393	0.939692	0.777778	0.161914	0.161914	165	0.16574	160	0.0404785	0.98017	0.202393	0.777778	1.14208	0.939692	0.202393		165	0.833333	0.16574	0.999073	0.965925	0.033148
													0.033148	0.16574	0.965925	0.833333	0.132592	0.132592	170	0.119898	165	0.033148	0.999073	0.16574	0.833333	1.13167	0.965925	0.16574		170	0.888889	0.119898	1.00879	0.984807	0.0239796
													0.0239796	0.119898	0.984807	0.888889	0.0959184	0.0959184	175	0.0646875	170	0.0239796	1.00879	0.119898	0.888889	1.10471	0.984807	0.119898		175	0.944444	0.0646875	1.00913	0.996194	0.0129375
													0.0129375	0.0646875	0.996194	0.944444	0.05175	0.05175	180	-4.40092e-12	175	0.0129375	1.00913	0.0646875	0.944444	1.06088	0.996194	0.0646875		180	1	-4.40092e-12	1	1	-4.40092e-12
													-4.40092e-12	-4.40092e-12	1	1	0	-3.52074e-12	185	0.0646881	180	-4.40092e-12	1	-4.40092e-12	1	1	1	-4.40092e-12		185	0.944444	0.0646881	1.00913	0.996195	0.0129376
													0.0129376	0.0646881	0.996195	0.944444	0.0517505	0.0517505	190	0.119899	185	0.0129376	1.00913	0.0646881	0.944444	1.06088	0.996195	0.0646881		190	0.888889	0.119899	1.00879	0.984808	0.0239798
													0.0239798	0.119899	0.984808	0.888889	0.0959194	0.0959194	195	0.165742	190	0.0239798	1.00879	0.119899	0.888889	1.10471	0.984808	0.119899		195	0.833333	0.165742	0.999075	0.965927	0.0331483
													0.0331483	0.165742	0.965927	0.833333	0.132593	0.132593	200	0.202395	195	0.0331483	0.999075	0.165742	0.833333	1.13167	0.965927	0.165742		200	0.777778	0.202395	0.980173	0.939694	0.040479
													0.040479	0.202395	0.939694	0.777778	0.161916	0.161916	205	0.230109	200	0.040479	0.980173	0.202395	0.777778	1.14209	0.939694	0.202395		205	0.722222	0.230109	0.952331	0.906309	0.0460217
													0.0460217	0.230109	0.906309	0.722222	0.184087	0.184087	210	0.2492	205	0.0460217	0.952331	0.230109	0.722222	1.13642	0.906309	0.230109		210	0.666667	0.2492	0.915867	0.866027	0.0498401
													0.0498401	0.2492	0.866027	0.666667	0.19936	0.19936	215	0.260053	210	0.0498401	0.915867	0.2492	0.666667	1.11523	0.866027	0.2492		215	0.611111	0.260053	0.871165	0.819154	0.0520107
													0.0520107	0.260053	0.819154	0.611111	0.208043	0.208043	220	0.263114	215	0.0520107	0.871165	0.260053	0.611111	1.07921	0.819154	0.260053		220	0.555556	0.263114	0.818669	0.766047	0.0526227
													0.0526227	0.263114	0.766047	0.555556	0.210491	0.210491	225	0.258886	220	0.0526227	0.818669	0.263114	0.555556	1.02916	0.766047	0.263114		225	0.5	0.258886	0.758886	0.707109	0.0517773
													0.0517773	0.258886	0.707109	0.5	0.207109	0.207109	230	0.247932	225	0.0517773	0.758886	0.258886	0.5	0.965996	0.707109	0.258886		230	0.444444	0.247932	0.692377	0.64279	0.0495864
													0.0495864	0.247932	0.64279	0.444444	0.198346	0.198346	235	0.230863	230	0.0495864	0.692377	0.247932	0.444444	0.890722	0.64279	0.247932		235	0.388889	0.230863	0.619752	0.573579	0.0461726
													0.0461726	0.230863	0.573579	0.388889	0.18469	0.18469	240	0.208337	235	0.0461726	0.619752	0.230863	0.388889	0.804442	0.573579	0.230863		240	0.333333	0.208337	0.54167	0.500003	0.0416674
													0.0416674	0.208337	0.500003	0.333333	0.16667	0.16667	245	0.181055	240	0.0416674	0.54167	0.208337	0.333333	0.70834	0.500003	0.208337		245	0.277778	0.181055	0.458832	0.422622	0.0362109
													0.0362109	0.181055	0.422622	0.277778	0.144844	0.144844	250	0.149752	245	0.0362109	0.458832	0.181055	0.277778	0.603676	0.422622	0.181055		250	0.222222	0.149752	0.371974	0.342024	0.0299503
													0.0299503	0.149752	0.342024	0.222222	0.119801	0.119801	255	0.115195	250	0.0299503	0.371974	0.149752	0.222222	0.491775	0.342024	0.149752		255	0.166667	0.115195	0.281862	0.258823	0.023039
													0.023039	0.115195	0.258823	0.166667	0.092156	0.092156	260	0.0781761	255	0.023039	0.281862	0.115195	0.166667	0.374018	0.258823	0.115195		260	0.111111	0.0781761	0.189287	0.173652	0.0156352
													0.0156352	0.0781761	0.173652	0.111111	0.0625408	0.0625408	265	0.0395051	260	0.0156352	0.189287	0.0781761	0.111111	0.251828	0.173652	0.0781761		265	0.0555556	0.0395051	0.0950607	0.0871596	0.00790102
													0.00790102	0.0395051	0.0871596	0.0555556	0.0316041	0.0316041	270	4.97548e-06	265	0.00790102	0.0950607	0.0395051	0.0555556	0.126665	0.0871596	0.0395051		270	0	4.97548e-06	4.97548e-06	3.98038e-06	9.95101e-07
													9.95101e-07	4.97548e-06	3.98038e-06	0	3.98038e-06	3.98038e-06	275	-0.0394952	270	9.95101e-07	4.97548e-06	4.97548e-06	0	8.95586e-06	3.98038e-06	4.97548e-06		275	-0.0555556	-0.0394952	-0.0950507	-0.0871517	-0.00789904
													-0.00789904	-0.0394952	-0.0871517	-0.0555556	-0.0315961	-0.0315961	280	-0.0781663	275	-0.00789904	-0.0950507	-0.0394952	-0.0555556	-0.126647	-0.0871517	-0.0394952		280	-0.111111	-0.0781663	-0.189277	-0.173644	-0.0156332
													-0.0156332	-0.0781663	-0.173644	-0.111111	-0.062533	-0.062533	285	-0.115185	280	-0.0156332	-0.189277	-0.0781663	-0.111111	-0.25181	-0.173644	-0.0781663		285	-0.166667	-0.115185	-0.281852	-0.258815	-0.0230371
													-0.0230371	-0.115185	-0.258815	-0.166667	-0.0921483	-0.0921483	290	-0.149742	285	-0.0230371	-0.281852	-0.115185	-0.166667	-0.374	-0.258815	-0.115185		290	-0.222222	-0.149742	-0.371965	-0.342016	-0.0299485
													-0.0299485	-0.149742	-0.342016	-0.222222	-0.119794	-0.119794	295	-0.181046	290	-0.0299485	-0.371965	-0.149742	-0.222222	-0.491759	-0.342016	-0.149742		295	-0.277778	-0.181046	-0.458823	-0.422614	-0.0362091
													-0.0362091	-0.181046	-0.422614	-0.277778	-0.144837	-0.144837	300	-0.208329	295	-0.0362091	-0.458823	-0.181046	-0.277778	-0.60366	-0.422614	-0.181046		300	-0.333333	-0.208329	-0.541662	-0.499996	-0.0416657
													-0.0416657	-0.208329	-0.499996	-0.333333	-0.166663	-0.166663	305	-0.230855	300	-0.0416657	-0.541662	-0.208329	-0.333333	-0.708325	-0.499996	-0.208329		305	-0.388889	-0.230855	-0.619744	-0.573573	-0.046171
													-0.046171	-0.230855	-0.573573	-0.388889	-0.184684	-0.184684	310	-0.247925	305	-0.046171	-0.619744	-0.230855	-0.388889	-0.804428	-0.573573	-0.230855		310	-0.444444	-0.247925	-0.692369	-0.642784	-0.0495849
													-0.0495849	-0.247925	-0.642784	-0.444444	-0.19834	-0.19834	315	-0.258879	310	-0.0495849	-0.692369	-0.247925	-0.444444	-0.890709	-0.642784	-0.247925		315	-0.5	-0.258879	-0.758879	-0.707103	-0.0517759
													-0.0517759	-0.258879	-0.707103	-0.5	-0.207103	-0.207103	320	-0.263107	315	-0.0517759	-0.758879	-0.258879	-0.5	-0.965983	-0.707103	-0.258879		320	-0.555556	-0.263107	-0.818663	-0.766041	-0.0526215
													-0.0526215	-0.263107	-0.766041	-0.555556	-0.210486	-0.210486	325	-0.260048	320	-0.0526215	-0.818663	-0.263107	-0.555556	-1.02915	-0.766041	-0.263107		325	-0.611111	-0.260048	-0.871159	-0.819149	-0.0520095
													-0.0520095	-0.260048	-0.819149	-0.611111	-0.208038	-0.208038	330	-0.249195	325	-0.0520095	-0.871159	-0.260048	-0.611111	-1.0792	-0.819149	-0.260048		330	-0.666667	-0.249195	-0.915862	-0.866023	-0.0498391
													-0.0498391	-0.249195	-0.866023	-0.666667	-0.199356	-0.199356	335	-0.230104	330	-0.0498391	-0.915862	-0.249195	-0.666667	-1.11522	-0.866023	-0.249195		335	-0.722222	-0.230104	-0.952327	-0.906306	-0.0460209
													-0.0460209	-0.230104	-0.906306	-0.722222	-0.184083	-0.184083	340	-0.202391	335	-0.0460209	-0.952327	-0.230104	-0.722222	-1.13641	-0.906306	-0.230104		340	-0.777778	-0.202391	-0.980169	-0.939691	-0.0404783
													-0.0404783	-0.202391	-0.939691	-0.777778	-0.161913	-0.161913	345	-0.165739	340	-0.0404783	-0.980169	-0.202391	-0.777778	-1.14208	-0.939691	-0.202391		345	-0.833333	-0.165739	-0.999072	-0.965925	-0.0331478
													-0.0331478	-0.165739	-0.965925	-0.833333	-0.132591	-0.132591	350	-0.119897	345	-0.0331478	-0.999072	-0.165739	-0.833333	-1.13166	-0.965925	-0.165739		350	-0.888889	-0.119897	-1.00879	-0.984807	-0.0239795
													-0.0239795	-0.119897	-0.984807	-0.888889	-0.095918	-0.095918	355	-0.0646872	350	-0.0239795	-1.00879	-0.119897	-0.888889	-1.1047	-0.984807	-0.119897		355	-0.944444	-0.0646872	-1.00913	-0.996194	-0.0129374
													-0.0129374	-0.0646872	-0.996194	-0.944444	-0.0517498	-0.0517498	360	1.76037e-11	355	-0.0129374	-1.00913	-0.0646872	-0.944444	-1.06088	-0.996194	-0.0646872		360	-1	1.76037e-11	-1	-1	1.76037e-11
													1.76037e-11	1.76037e-11	-1	-1	0	1.40831e-11			360	1.76037e-11	-1	1.76037e-11	-1		-1	1.76037e-11
																			Cos-INV		jan
															0	0		0	0	0	0
															5	-0.0517503		5	-0.0517503	5	-0.0646878
															10	-0.0959189		10	-0.0959189	10	-0.119899
															15	-0.132593		15	-0.132593	15	-0.165741
															20	-0.161915		20	-0.161915	20	-0.202394
															25	-0.184086		25	-0.184086	25	-0.230107
															30	-0.199359		30	-0.199359	30	-0.249199
															35	-0.208041		35	-0.208041	35	-0.260052
															40	-0.210489		40	-0.210489	40	-0.263112
															45	-0.207107		45	-0.207107	45	-0.258884
															50	-0.198344		50	-0.198344	50	-0.24793
															55	-0.184688		55	-0.184688	55	-0.23086
															60	-0.166667		60	-0.166667	60	-0.208334
															65	-0.144841		65	-0.144841	65	-0.181052
															70	-0.119799		70	-0.119799	70	-0.149749
															75	-0.0921534		75	-0.0921534	75	-0.115192
															80	-0.0625382		80	-0.0625382	80	-0.0781728
															85	-0.0316014		85	-0.0316014	85	-0.0395018
															90	-1.32679e-06		90	-1.32679e-06	90	-1.65849e-06
															95	0.0315988		95	0.0315988	95	0.0394985
															100	0.0625356		100	0.0625356	100	0.0781695
															105	0.0921509		105	0.0921509	105	0.115189
															110	0.119796		110	0.119796	110	0.149745
															115	0.144839		115	0.144839	115	0.181049
															120	0.166665		120	0.166665	120	0.208331
															125	0.184686		125	0.184686	125	0.230858
															130	0.198342		130	0.198342	130	0.247927
															135	0.207105		135	0.207105	135	0.258882
															140	0.210488		140	0.210488	140	0.263109
															145	0.20804		145	0.20804	145	0.26005
															150	0.199358		150	0.199358	150	0.249197
															155	0.184085		155	0.184085	155	0.230106
															160	0.161914		160	0.161914	160	0.202393
															165	0.132592		165	0.132592	165	0.16574
															170	0.0959184		170	0.0959184	170	0.119898
															175	0.05175		175	0.05175	175	0.0646875
															180	0		180	0	180	-4.40092e-12
															185	0.0517505		185	0.0517505	185	0.0646881
															190	0.0959194		190	0.0959194	190	0.119899
															195	0.132593		195	0.132593	195	0.165742
															200	0.161916		200	0.161916	200	0.202395
															205	0.184087		205	0.184087	205	0.230109
															210	0.19936		210	0.19936	210	0.2492
															215	0.208043		215	0.208043	215	0.260053
															220	0.210491		220	0.210491	220	0.263114
															225	0.207109		225	0.207109	225	0.258886
															230	0.198346		230	0.198346	230	0.247932
															235	0.18469		235	0.18469	235	0.230863
															240	0.16667		240	0.16667	240	0.208337
															245	0.144844		245	0.144844	245	0.181055
															250	0.119801		250	0.119801	250	0.149752
															255	0.092156		255	0.092156	255	0.115195
															260	0.0625408		260	0.0625408	260	0.0781761
															265	0.0316041		265	0.0316041	265	0.0395051
															270	3.98038e-06		270	3.98038e-06	270	4.97548e-06
															275	-0.0315961		275	-0.0315961	275	-0.0394952
															280	-0.062533		280	-0.062533	280	-0.0781663
															285	-0.0921483		285	-0.0921483	285	-0.115185
															290	-0.119794		290	-0.119794	290	-0.149742
															295	-0.144837		295	-0.144837	295	-0.181046
															300	-0.166663		300	-0.166663	300	-0.208329
															305	-0.184684		305	-0.184684	305	-0.230855
															310	-0.19834		310	-0.19834	310	-0.247925
															315	-0.207103		315	-0.207103	315	-0.258879
															320	-0.210486		320	-0.210486	320	-0.263107
															325	-0.208038		325	-0.208038	325	-0.260048
															330	-0.199356		330	-0.199356	330	-0.249195
															335	-0.184083		335	-0.184083	335	-0.230104
															340	-0.161913		340	-0.161913	340	-0.202391
															345	-0.132591		345	-0.132591	345	-0.165739
															350	-0.095918		350	-0.095918	350	-0.119897
															355	-0.0517498		355	-0.0517498	355	-0.0646872
															360	0		360	0	360	1.76037e-11
