# Supplementary material for: Simulated Non-Local EPR Correlation: CHSH = 3
Source: Preprints.org preprint supplement (doi:10.20944/preprints202301.0570.v1), 2023-01-31
Supplement: Supplementary file 1 [file supplementary]

Archive with 26 entries (25 files):
- EPR correlations Sanctuary/desktop.ini
- EPR correlations Sanctuary/Excel EPR Data.xlsx
- EPR correlations Sanctuary/Ggn plotting.pdf
- EPR correlations Sanctuary/README.pdf
- EPR correlations Sanctuary/simC_b5.c
- EPR correlations Sanctuary/simF_b5.f
- EPR correlations Sanctuary/Txt files/
- EPR correlations Sanctuary/Txt files/CalCos.txt
- EPR correlations Sanctuary/Txt files/CalFM.txt
- EPR correlations Sanctuary/Txt files/CalIVTrig.txt
- EPR correlations Sanctuary/Txt files/EQC.txt
- EPR correlations Sanctuary/Txt files/EQCNEQPm.txt
- EPR correlations Sanctuary/Txt files/EQCNEQPp.txt
- EPR correlations Sanctuary/Txt files/EQP.txt
- EPR correlations Sanctuary/Txt files/EQPNEQCm.txt
- EPR correlations Sanctuary/Txt files/EQPNEQCp.txt
- EPR correlations Sanctuary/Txt files/FMSine.txt
- EPR correlations Sanctuary/Txt files/NEQC.txt
- EPR correlations Sanctuary/Txt files/NEQP.txt
- EPR correlations Sanctuary/Txt files/QMvsQUAT.txt
- EPR correlations Sanctuary/Txt files/RawData.txt
- EPR correlations Sanctuary/Txt files/SimCaldiff.txt
- EPR correlations Sanctuary/Txt files/SimCos.txt
- EPR correlations Sanctuary/Txt files/SimFM.txt
- EPR correlations Sanctuary/Txt files/SimIVTrig.txt
- EPR correlations Sanctuary/Txt files/zero.txt
