# Supplementary material for: Simulated Non-Local EPR Correlation: CHSH = 3
Source: Preprints.org preprint supplement (doi:10.20944/preprints202301.0570.v1), 2023-01-31
Supplement: Supplementary file 1 [file supplementary › EPR correlations Sanctuary/Ggn plotting.pdf]

[Gnuplot help](#)

To plot

### The basics are calculated

- -cosine CalCos.txt
- Inverted triangle CalIVTrig.txt
- FM CalFM.txt
- Zero zero.txt

### Simulated

- The residual SimCaldiff.txt
- Quaternion full SimCos.txt ok
- Inverted triangle SimIVTrig.txt ok
- FM SimFM.txt ok
- RawData RawData.txt ok
- FM-Sine Fit FMSin.txt ok
- QMvsQUAT QMvsQUAT.txt ok

### The basic plot for correlations:

```
set xrange [0:360]
set yrange [-1:1.1]
set xtics 45
set sample 400
set title "Correlation" font ",12"
set xlabel "(a - b)" font ",12"
```

### The basic plot

```
set xrange [0:360]
set xtics 45
set sample 400
set xlabel "(a - b)" font ",12"
```

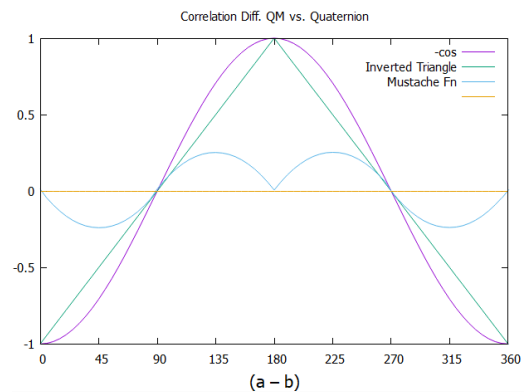

*'c:/g77/bin/CalCos.txt' using 1:2 with line title '-cos', 'c:/g77/bin/CalIVTrig.txt' using 1:2 with line title 'Triangle', 'c:/g77/bin/CalFM.txt' using 1:2 with line title 'Mustache Fn', 'c:/g77/bin/zero.txt' using 1:2 with line title 'Zero'*

### Figure 2 title EPR correlation from polarization

```
set xrange [0:360]
set yrange [-1:1.1]
set xtics 45
set ytics .5
set sample 400
```

```
set xlabel "(a – b)" font ",12"
set title "Quaternion Polarization" font ",12"
```

```
plot 'c:/g77/bin/SimIVTrig.txt' using 1:2 with linespoint title 'Polarization CHSH =2.027', 'c:/g77/bin/CalCos.txt'
using 1:2 with line title '-cos', 'c:/g77/bin/CalIVTrig.txt' using 1:2 with line title 'Triangle', 'c:/g77/bin/CalFM.txt'
using 1:2 with line title 'Mustache Fn', 'c:/g77/bin/zero.txt' using 1:2 with line title ' ' ' '
```

```
Triangle', 'c:/g77/bin/SimFM.txt' using 1:2 with line title 'Mustache Fn', 'c:/g77/bin/zero.txt' using 1:2 with line title
' ' ' '
```

### Figure 3 title Quaternion residual correlation

```
set xtics 45
set sample 400
set xlabel "(a – b)" font ",12"
set xrange [45:135]
set yrange [-.25:.25]
```

```
set title "Residual correlation"
```

```
plot 'c:/g77/bin/SimIVTrig.txt' using 1:2 with line title 'Residual correlation CHSH=0.027', 'c:/g77/bin/CalIVTrig.txt'
using 1:2 with line title 'Triangle', 'c:/g77/bin/zero.txt' using 1:2 with line title ' ' ' '
```

### Figure 3 (insert) title Coherence from polarization

```
set xtics 45
set ytics .01
set sample 400
set xlabel "(a – b)" font ",12"
set xrange [0:360]
set yrange [-.02:.02]
```

```
set title "Residual correlation"
```

```
plot 'c:/g77/bin/SimCaldiff.txt' using 1:2 with linespoint title 'Residual correlation CHSH =
0.027', 'c:/g77/bin/zero.txt' using 1:2 with line title ' ' ' '
```

### Figure 4 title EPR correlation from coherence

```
set xtics 45
set sample 400
set xlabel "(a – b)" font ",12"
set xrange [0:360]
set yrange [-1.:1.1]
```

```
set title "Quaternion Coherence"
```

```
plot 'c:/g77/bin/SimFM.txt' using 1:2 with linespoint title 'Coherence CHSH = 0.968', 'c:/g77/bin/CalCos.txt' using
1:2 with line title '-cos', 'c:/g77/bin/CalIVTrig.txt' using 1:2 with line title 'Triangle', 'c:/g77/bin/CalFM.txt' using 1:2
with line title 'Mustache Fn', 'c:/g77/bin/zero.txt' using 1:2 with line title ' ' ' '
```

**Figure 5** EPR correlation: Full

```
set xtics 45
set sample 400
set xlabel "(a - b)" font ",12"
set xrange [0:360]
set yrange [-1.:1.1]
set title " EPR correlation: Full "
```

```
plot 'c:/g77/bin/SimCos.txt' using 1:2 with linespoint title 'Full correlation CHSH = 2.995', 'c:/g77/bin/SimIVTrig.txt'
using 1:2 with linespoint title 'Polarization CHSH = 2.027', 'c:/g77/bin/SimFM.txt' using 1:2 with linespoint title
'Coherence CHSH = 0.968', 'c:/g77/bin/SimCaldiff.txt' using 1:2 with line title 'Residual coherence CHSH =
0.027', 'c:/g77/bin/CalCos.txt' using 1:2 with line title '-cos CHSH = 2.707', 'c:/g77/bin/CalIVTrig.txt' using 1:2 with
line title 'Triangle', 'c:/g77/bin/CalFM.txt' using 1:2 with line title 'Mustache Fn', 'c:/g77/bin/zero.txt' using 1:2 with
line title ' '
```

**Figure 6 title** Raw Data normalized

```
EQC      EQC.txt
NEQP     NEQP.txt
EQP      EQP.txt
NEQC     NEQC.txt
```

```
set xrange [0:360]
set yrange [0:1]
set xtics 45
set ytics .25
set sample 400
set xlabel "(a - b)" font ",12"
```

```
set title "Raw Data normalized"
```

```
plot 'c:/g77/bin/EQP.txt' using 1:2 with linespoint title 'EQP', 'c:/g77/bin/NEQP.txt' using 1:2 with linespoint title
'NEQP', 'c:/g77/bin/EQC.txt' using 1:2 with linespoint title 'EQC', 'c:/g77/bin/NEQC.txt' using 1:2 with linespoint title
'NEQC', 'c:/g77/bin/zero.txt' using 1:2 with line title ' '
```

```
'c:/g77/bin/EQP.txt' using 1:2 with linespoint title 'EQP'
'c:/g77/bin/NEQP.txt' using 1:2 with linespoint title 'NEQP'
'c:/g77/bin/EQC.txt' using 1:2 with linespoint title 'EQC'
'c:/g77/bin/NEQC.txt' using 1:2 with linespoint title 'NEQC'
```

**Figure 6 title** Mustache vs. sin(2x)

```
set xrange [0:360]
set yrange [-.3:.3]
set xtics 45
set ytics .3
```

```

set sample 400
set xlabel "(a - b)" font ",12"
set title "Mustache vs. sin(2x)"

```

```

plot 'c:/g77/bin/SimFM.txt' using 1:2 with linespoint title 'Coherence CHSH=0.968', 'c:/g77/bin/FMSine.txt' using 1:2 with line title 'Sin2x', 'c:/g77/bin/zero.txt' using 1:2 with line title ' '

```

**Figure 7 title** Mixing polarization and coherence

Create the data from the parts in the excel sheet "Excel Plots.xls"

|            |              |
|------------|--------------|
| EQC + NEQP | EQCNEQPp.txt |
| EQC - NEQP | EQCNEQPm.txt |
| EQP + NEQC | EQPNEQCp.txt |
| EQP - NEQC | EQPNEQcm.txt |

```

set xtics 45
set ytics .5
set sample 400
set xlabel "(a - b)" font ",12"
set xrange [0:360]
set yrange [-.5:1.5]
set title "Mix polarization and coherence"

```

```

plot 'c:/g77/bin/EQCNEQPp.txt' using 1:2 with linespoint title 'EQC + NEQP', 'c:/g77/bin/EQCNEQPm.txt' using 1:2 with linespoint title 'EQC - NEQP', 'c:/g77/bin/EQPNEQCp.txt' using 1:2 with linespoint title 'EQP + NEQC', 'c:/g77/bin/EQPNEQcm.txt' using 1:2 with linespoint title 'EQP - NEQC', 'c:/g77/bin/zero.txt' using 1:2 with line title ' '

```

**Figure 9 title** The Polarizer Plane

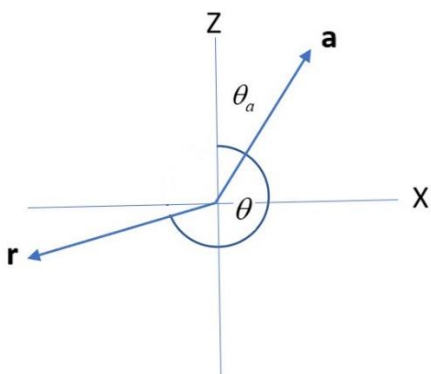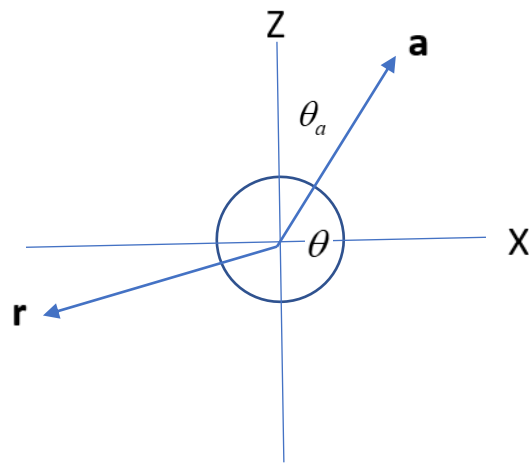

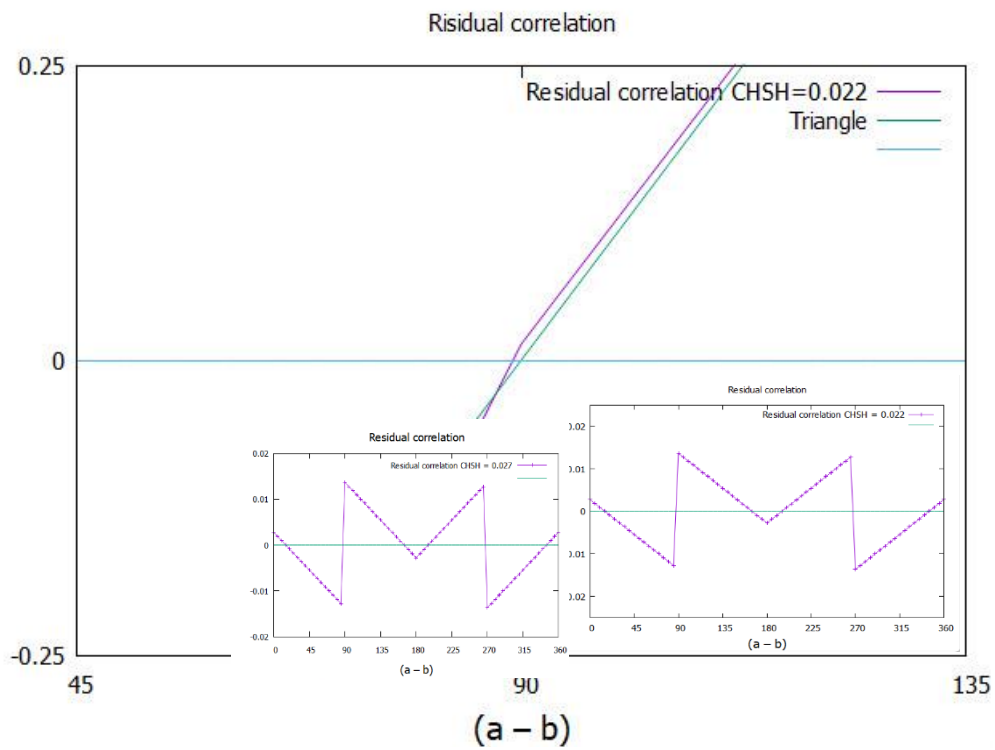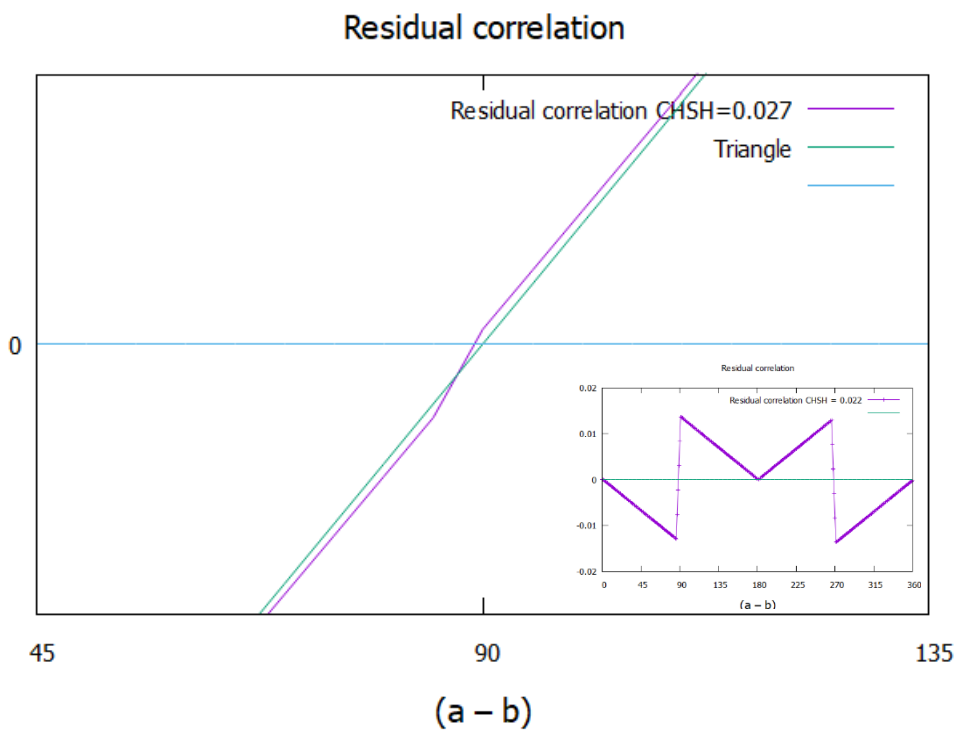

Residual correlation

## How to ... in GnuPlot (in examples)

Assembled by Ross Bannister, University of Reading

### Installation

#### Issues

If no screen output is available in installation, try

```
sudo apt-get update
```

```
sudo apt-get install gnuplot-x11
```

---

### Plot commands

Plotting column a against column b

```
plot "filename" using a:b with lines/points/ linecolor rgb "colour-name"
```

(a and b are column numbers)

```
plot "filename" using ($a/100):b ...
```

### Key label for a particular line

```
plot ... title 'Plot-title'
```

---

### Settings

Set the line style in following plot commands

```
set style data lines/points/
```

#### Set various labels in following plot commands

```
set title "plot-title" font ",12"
```

```
set xlabel "x-axis-label" font ",12"
```

```
set ylabel "y-axis-label" font ",12"
```

#### Label the lines in-situ in following plot command

```
set label 1 'text for label line 1'
```

#### Set aspect ratio for following plot command

```
set size ratio-x, ratio-y
```

(e.g. set size 1, 0.5 makes the plot half as high as wide)

or

```
set size ratio ratio-value
```

(e.g. set size ratio 0.5 does the same as the above)

#### Set tic details

```
set xtics delta-x font ",12"
```

#### Key

```
unset key
```

```
set key
```

```
set key bottom right
```

```
set key font ",24"
```

---

### Output

```
set term postscript color
```

```
set output "filename.ps"
```

---

### Short cuts

Define multiple line attributes

```
set style line line-number lt 2 lc rgb "colour-name" lw 2
```

lt=line type (1=continuous, 2=dashed, 3=dotted, 4=dot-dashed, 5=dot-dot-dashed)

lw=line width

Plot with

```
plot "file-name" ls line-number
```
