# Supplementary material for: Simulated Non-Local EPR Correlation: CHSH = 3
Source: Preprints.org preprint supplement (doi:10.20944/preprints202301.0570.v1), 2023-01-31
Supplement: Supplementary file 1 [file supplementary › EPR correlations Sanctuary/README.pdf]

# Simulated non-local EPR correlation: CHSH = 3

Bryan Sanctuary

December 2022

Here I outline how to run the programs

- Unzip the file “**EPR correlations Sanctuary.zip**”

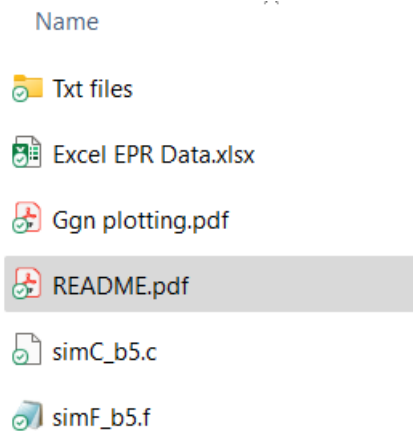

- The programs are FORTRAN **simf\_b5.f** and translated to C by Pierre Leroy, **simc\_b5.c**
- All the plotting data is in the **EPR data.xlsx** file. It is protected and can be unprotected with PW

## EPR\_Sanctuary

- Plotting: the figures in the paper were produced with gnuplot  
<https://www.gnu.org/software/software.en.html>

The program

- **Gnu plotting.pdf** gives all the gnu code for producing the plots in the paper.
- To compile the program, install the FORTRAN compiler G77  
<https://gcc.gnu.org/fortran/>
- After installation, open a command prompt and run the program **simf\_b5.f**

```
Command Prompt

Microsoft Windows [Version 10.0.22000.1335]
(c) Microsoft Corporation. All rights reserved.

C:\Users\User>cd \g77\bin

C:\g77\bin>g77 simf_b5.f
```

- After it compiles run the program 'a.exe' from the directory

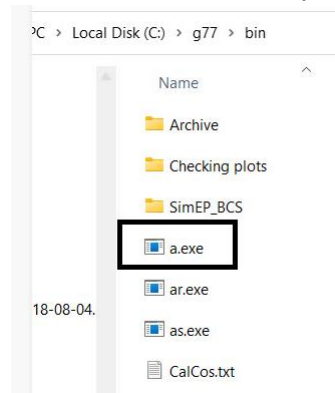

- The data is found in three files:

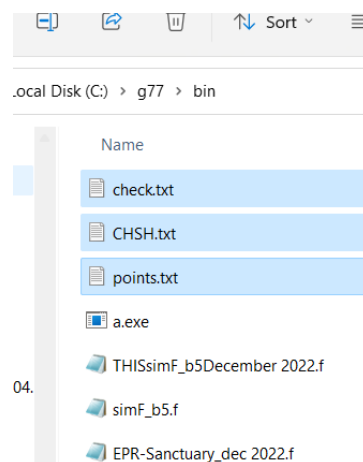

- Check.txt has all the raw click data as the total number of clicks
- CHSH.txt contains the CHSH value
- points.txt contains the results of the calculation from 0 to 360 degrees.
