# Supplementary material for: Simulated Non-Local EPR Correlation: CHSH = 3
Source: Preprints.org preprint supplement (doi:10.20944/preprints202301.0570.v1), 2023-01-31
Supplement: Supplementary file 1 [file supplementary › EPR correlations Sanctuary/Txt files/CalCos.txt]

0	-1
5	-0.996194705
10	-0.984807779
15	-0.965925884
20	-0.939692722
25	-0.906307943
30	-0.866025625
35	-0.81915234
40	-0.766044822
45	-0.70710725
50	-0.642788174
55	-0.573577101
60	-0.500000766
65	-0.42261913
70	-0.342021113
75	-0.258820113
80	-0.173649339
85	-0.087156991
90	-1.32679E-06
95	0.087154348
100	0.173646726
105	0.25881755
110	0.342018619
115	0.422616725
120	0.499998468
125	0.573574927
130	0.642786142
135	0.707105374
140	0.766043116
145	0.819150818
150	0.866024298
155	0.906306821
160	0.939691814
165	0.965925197
170	0.984807318
175	0.996194473
180	1
185	0.996194936
190	0.984808239
195	0.96592657
200	0.939693629
205	0.906309064
210	0.866026952
215	0.819153862
220	0.766046528
225	0.707109127
230	0.642790207
235	0.573579274
240	0.500003064
245	0.422621535
250	0.342023607
255	0.258822676
260	0.173651952
265	0.087159635
270	3.98038E-06
275	-0.087151704
280	-0.173644113
285	-0.258814987
290	-0.342016126
295	-0.42261432
300	-0.49999617
305	-0.573572753
310	-0.642784109
315	-0.707103498
320	-0.766041411
325	-0.819149296
330	-0.866022971
335	-0.9063057
340	-0.939690906
345	-0.96592451
350	-0.984806857
355	-0.996194242
360	-1
