# Supplementary material for: Simulated Non-Local EPR Correlation: CHSH = 3
Source: Preprints.org preprint supplement (doi:10.20944/preprints202301.0570.v1), 2023-01-31
Supplement: Supplementary file 1 [file supplementary › EPR correlations Sanctuary/Txt files/CalFM.txt]

0	0
5	-0.051750261
10	-0.09591889
15	-0.132592551
20	-0.161914944
25	-0.184085721
30	-0.199358958
35	-0.208041229
40	-0.210489266
45	-0.20710725
50	-0.19834373
55	-0.184688212
60	-0.166667433
65	-0.144841352
70	-0.119798891
75	-0.092153446
80	-0.062538228
85	-3.16E-02
90	-1.32679E-06
95	0.031598792
100	0.062535615
105	0.092150883
110	0.119796397
115	0.144838947
120	0.166665135
125	0.184686038
130	0.198341698
135	0.207105374
140	0.21048756
145	0.208039707
150	0.199357631
155	0.184084599
160	0.161914036
165	0.132591864
170	0.095918429
175	5.18E-02
180	0
185	0.051750492
190	0.09591935
195	0.132593237
200	0.161915851
205	0.184086842
210	0.199360285
215	0.208042751
220	0.210490972
225	0.207109127
230	0.198345763
235	0.184690385
240	0.166669731
245	0.144843757
250	0.119801385
255	0.092156009
260	0.062540841
265	3.16E-02
270	3.98038E-06
275	-0.031596148
280	-0.062533002
285	-0.09214832
290	-0.119793904
295	-0.144836542
300	-0.166662837
305	-0.184683864
310	-0.198339665
315	-0.207103498
320	-0.210485855
325	-0.208038185
330	-0.199356304
335	-0.184083478
340	-0.161913128
345	-0.132591177
350	-0.095917968
355	-5.17E-02
360	0
