# Supplementary material for: Simulated Non-Local EPR Correlation: CHSH = 3
Source: Preprints.org preprint supplement (doi:10.20944/preprints202301.0570.v1), 2023-01-31
Supplement: Supplementary file 1 [file supplementary › EPR correlations Sanctuary/Txt files/CalIVTrig.txt]

0	-1
5	-0.944444444
10	-0.888888889
15	-0.833333333
20	-0.777777778
25	-0.722222222
30	-0.666666667
35	-0.611111111
40	-0.555555556
45	-0.5
50	-0.444444444
55	-0.388888889
60	-0.333333333
65	-0.277777778
70	-0.222222222
75	-0.166666667
80	-0.111111111
85	-0.055555556
90	0
95	0.055555556
100	0.111111111
105	0.166666667
110	0.222222222
115	0.277777778
120	0.333333333
125	0.388888889
130	0.444444444
135	0.5
140	0.555555556
145	0.611111111
150	0.666666667
155	0.722222222
160	0.777777778
165	0.833333333
170	0.888888889
175	0.944444444
180	1
185	0.944444444
190	0.888888889
195	0.833333333
200	0.777777778
205	0.722222222
210	0.666666667
215	0.611111111
220	0.555555556
225	0.5
230	0.444444444
235	0.388888889
240	0.333333333
245	0.277777778
250	0.222222222
255	0.166666667
260	0.111111111
265	0.055555556
270	0
275	-0.055555556
280	-0.111111111
285	-0.166666667
290	-0.222222222
295	-0.277777778
300	-0.333333333
305	-0.388888889
310	-0.444444444
315	-0.5
320	-0.555555556
325	-0.611111111
330	-0.666666667
335	-0.722222222
340	-0.777777778
345	-0.833333333
350	-0.888888889
355	-0.944444444
360	-1
