# Supplementary material for: Simulated Non-Local EPR Correlation: CHSH = 3
Source: Preprints.org preprint supplement (doi:10.20944/preprints202301.0570.v1), 2023-01-31
Supplement: Supplementary file 1 [file supplementary › EPR correlations Sanctuary/Txt files/EQC.txt]

0	0.506754385
5	0.477535978
10	0.454692495
15	0.434884692
20	0.418112567
25	0.404414067
30	0.393789191
35	0.386199994
40	0.381646476
45	0.380138123
50	0.381276503
55	0.385450561
60	0.392660298
65	0.402905714
70	0.416215268
75	0.432607933
80	0.452036276
85	0.474500299
90	0.506839764
95	0.532263573
100	0.554651703
105	0.574004155
110	0.590320928
115	0.60355459
120	0.613724114
125	0.620857959
130	0.624956125
135	0.626028099
140	0.624586152
145	0.620108526
150	0.612595221
155	0.602046237
160	0.588423629
165	0.571727396
170	0.551995484
175	0.529227894
180	0.503434112
185	0.529313273
190	0.552156755
195	0.571964558
200	0.588736683
205	0.602435184
210	0.613060059
215	0.620649256
220	0.625202774
225	0.626711127
230	0.625572747
235	0.621398689
240	0.614188952
245	0.603943536
250	0.590633983
255	0.574241317
260	0.554812974
265	0.532348951
270	0.500009486
275	0.474585677
280	0.452197547
285	0.432845095
290	0.416528322
295	0.40329466
300	0.393125136
305	0.385991291
310	0.381893125
315	0.380821151
320	0.382263098
325	0.386740725
330	0.394254029
335	0.404803013
340	0.418425621
345	0.435121854
350	0.454853766
355	0.477621356
360	0.503415139
