# Supplementary material for: Simulated Non-Local EPR Correlation: CHSH = 3
Source: Preprints.org preprint supplement (doi:10.20944/preprints202301.0570.v1), 2023-01-31
Supplement: Supplementary file 1 [file supplementary › EPR correlations Sanctuary/Txt files/EQCNEQPm.txt]

0	-0.491855843
5	-0.493753142
10	-0.489275516
15	-0.481762211
20	-0.471213228
25	-0.45759062
30	-0.440894387
35	-0.421162475
40	-0.398394885
45	-0.372582129
50	-0.344122641
55	-0.312627475
60	-0.278096629
65	-0.240530105
70	-0.199899443
75	-0.15618567
80	-0.109436218
85	-0.059651087
90	0.013670041
95	0.066414958
100	0.116124197
105	0.162797757
110	0.206435639
115	0.246990409
120	0.284481041
125	0.318935995
130	0.350355269
135	0.378748352
140	0.404627513
145	0.427470995
150	0.447278799
155	0.464050924
160	0.477749424
165	0.488374299
170	0.495963496
175	0.500517014
180	0.50204434
185	0.500602392
190	0.496124766
195	0.488611462
200	0.478062478
205	0.46443987
210	0.447743637
215	0.428011725
220	0.405244135
225	0.379431379
230	0.350971892
235	0.319476725
240	0.28494588
245	0.247379355
250	0.206748693
255	0.16303492
260	0.116285468
265	0.066500337
270	-0.006820791
275	-0.059565708
280	-0.109274947
285	-0.155948507
290	-0.199586389
295	-0.240141159
300	-0.277631791
305	-0.312086745
310	-0.343506019
315	-0.371899102
320	-0.397778263
325	-0.420621745
330	-0.440429549
335	-0.457201673
340	-0.470900174
345	-0.481525049
350	-0.489114246
355	-0.493667764
360	-0.49519509
