# Supplementary material for: Simulated Non-Local EPR Correlation: CHSH = 3
Source: Preprints.org preprint supplement (doi:10.20944/preprints202301.0570.v1), 2023-01-31
Supplement: Supplementary file 1 [file supplementary › EPR correlations Sanctuary/Txt files/EQCNEQPp.txt]

0	1.505364613
5	1.448825097
10	1.398660507
15	1.351531595
20	1.307438361
25	1.266418753
30	1.228472769
35	1.193562464
40	1.161687837
45	1.132858376
50	1.106675647
55	1.083528597
60	1.063417226
65	1.046341533
70	1.032329978
75	1.021401535
80	1.01350877
85	1.008651684
90	1.000009486
95	0.998112187
100	0.993179209
105	0.985210553
110	0.974206217
115	0.960118771
120	0.942967186
125	0.922779923
130	0.899556981
135	0.873307846
140	0.84454479
145	0.812746056
150	0.777911643
155	0.740041551
160	0.699097834
165	0.655080493
170	0.608027473
175	0.557938774
180	0.504823883
185	0.558024153
190	0.608188743
195	0.655317655
200	0.699410889
205	0.740430497
210	0.778376481
215	0.813286786
220	0.845161413
225	0.873990874
230	0.900173603
235	0.923320653
240	0.943432025
245	0.960507717
250	0.974519272
255	0.985447715
260	0.99334048
265	0.998197566
270	1.006839764
275	1.008737063
280	1.013670041
285	1.021638697
290	1.032643033
295	1.046730479
300	1.063882064
305	1.084069327
310	1.107292269
315	1.133541404
320	1.16230446
325	1.194103194
330	1.228937607
335	1.266807699
340	1.307751416
345	1.351768757
350	1.398821777
355	1.448910476
360	1.502025367
