# Supplementary material for: Simulated Non-Local EPR Correlation: CHSH = 3
Source: Preprints.org preprint supplement (doi:10.20944/preprints202301.0570.v1), 2023-01-31
Supplement: Supplementary file 1 [file supplementary › EPR correlations Sanctuary/Txt files/EQP.txt]

0	0.001390
5	0.028711
10	0.056032
15	0.083353
20	0.110674
25	0.137995
30	0.165316
35	0.192638
40	0.219959
45	0.247280
50	0.274601
55	0.301922
60	0.329243
65	0.356564
70	0.383885
75	0.411206
80	0.438528
85	0.465849
90	0.506830
95	0.534151
100	0.561472
105	0.588794
110	0.616115
115	0.643436
120	0.670757
125	0.698078
130	0.725399
135	0.752720
140	0.780041
145	0.807362
150	0.834684
155	0.862005
160	0.889326
165	0.916647
170	0.943968
175	0.971289
180	0.998610
185	0.971289
190	0.943968
195	0.916647
200	0.889326
205	0.862005
210	0.834684
215	0.807362
220	0.780041
225	0.752720
230	0.725399
235	0.698078
240	0.670757
245	0.643436
250	0.616115
255	0.588794
260	0.561472
265	0.534151
270	0.493170
275	0.465849
280	0.438528
285	0.411206
290	0.383885
295	0.356564
300	0.329243
305	0.301922
310	0.274601
315	0.247280
320	0.219959
325	0.192638
330	0.165316
335	0.137995
340	0.110674
345	0.083353
350	0.056032
355	0.028711
360	0.001390
