# Supplementary material for: Simulated Non-Local EPR Correlation: CHSH = 3
Source: Preprints.org preprint supplement (doi:10.20944/preprints202301.0570.v1), 2023-01-31
Supplement: Supplementary file 1 [file supplementary › EPR correlations Sanctuary/Txt files/EQPNEQCp.txt]

0	0.494635387
5	0.551174903
10	0.601339493
15	0.648468405
20	0.692561639
25	0.733581247
30	0.771527231
35	0.806437536
40	0.838312163
45	0.867141624
50	0.893324353
55	0.916471403
60	0.936582774
65	0.953658467
70	0.967670022
75	0.978598465
80	0.98649123
85	0.991348316
90	0.999990514
95	1.001887813
100	1.006820791
105	1.014789447
110	1.025793783
115	1.039881229
120	1.057032814
125	1.077220077
130	1.100443019
135	1.126692154
140	1.15545521
145	1.187253944
150	1.222088357
155	1.259958449
160	1.300902166
165	1.344919507
170	1.391972527
175	1.442061226
180	1.495176117
185	1.441975847
190	1.391811257
195	1.344682345
200	1.300589111
205	1.259569503
210	1.221623519
215	1.186713214
220	1.154838587
225	1.126009126
230	1.099826397
235	1.076679347
240	1.056567975
245	1.039492283
250	1.025480728
255	1.014552285
260	1.00665952
265	1.001802434
270	0.993160236
275	0.991262937
280	0.986329959
285	0.978361303
290	0.967356967
295	0.953269521
300	0.936117936
305	0.915930673
310	0.892707731
315	0.866458596
320	0.83769554
325	0.805896806
330	0.771062393
335	0.733192301
340	0.692248584
345	0.648231243
350	0.601178223
355	0.551089524
360	0.497974633
