# Supplementary material for: Simulated Non-Local EPR Correlation: CHSH = 3
Source: Preprints.org preprint supplement (doi:10.20944/preprints202301.0570.v1), 2023-01-31
Supplement: Supplementary file 1 [file supplementary › EPR correlations Sanctuary/Txt files/FMSine.txt]

0	0
5	-0.043412008
10	-0.085504967
15	-0.124999904
20	-0.160696789
25	-0.191510992
30	-0.21650624
35	-0.234923067
40	-0.246201887
45	-0.25
50	-0.246202002
55	-0.234923294
60	-0.216506572
65	-0.191511419
70	-0.160697298
75	-0.125000479
80	-0.08550559
85	-0.043412661
90	-6.63397E-07
95	0.043411355
100	0.085504343
105	0.12499933
110	0.160696281
115	0.191510566
120	0.216505909
125	0.23492284
130	0.246201772
135	0.25
140	0.246202117
145	0.234923521
150	0.216506904
155	0.191511845
160	0.160697806
165	0.125001053
170	0.085506213
175	0.043413315
180	1.32679E-06
185	0.043410701
190	0.08550372
195	0.124998755
200	0.160695773
205	0.191510139
210	0.216505577
215	0.234922613
220	0.246201657
225	0.25
230	0.246202233
235	0.234923748
240	0.216507235
245	0.191512272
250	0.160698314
255	0.125001628
260	0.085506837
265	0.043413968
270	1.99019E-06
275	-0.043410048
280	-0.085503096
285	-0.124998181
290	-0.160695265
295	-0.191509713
300	-0.216505245
305	-0.234922386
310	-0.246201541
315	-0.25
320	-0.246202348
325	-0.234923975
330	-0.216507567
335	-0.191512698
340	-0.160698822
345	-0.125002202
350	-0.08550746
355	-0.043414621
360	-2.65359E-06
