# Supplementary material for: Simulated Non-Local EPR Correlation: CHSH = 3
Source: Preprints.org preprint supplement (doi:10.20944/preprints202301.0570.v1), 2023-01-31
Supplement: Supplementary file 1 [file supplementary › EPR correlations Sanctuary/Txt files/NEQC.txt]

0	0.493245615
5	0.522464022
10	0.545307505
15	0.565115308
20	0.581887433
25	0.595585933
30	0.606210809
35	0.613800006
40	0.618353524
45	0.619861877
50	0.618723497
55	0.614549439
60	0.607339702
65	0.597094286
70	0.583784732
75	0.567392067
80	0.547963724
85	0.525499701
90	0.493160236
95	0.467736427
100	0.445348297
105	0.425995845
110	0.409679072
115	0.39644541
120	0.386275886
125	0.379142041
130	0.375043875
135	0.373971901
140	0.375413848
145	0.379891474
150	0.387404779
155	0.397953763
160	0.411576371
165	0.428272604
170	0.448004516
175	0.470772106
180	0.496565888
185	0.470686727
190	0.447843245
195	0.428035442
200	0.411263317
205	0.397564816
210	0.386939941
215	0.379350744
220	0.374797226
225	0.373288873
230	0.374427253
235	0.378601311
240	0.385811048
245	0.396056464
250	0.409366017
255	0.425758683
260	0.445187026
265	0.467651049
270	0.499990514
275	0.525414323
280	0.547802453
285	0.567154905
290	0.583471678
295	0.59670534
300	0.606874864
305	0.614008709
310	0.618106875
315	0.619178849
320	0.617736902
325	0.613259275
330	0.605745971
335	0.595196987
340	0.581574379
345	0.564878146
350	0.545146234
355	0.522378644
360	0.496584861
