# Supplementary material for: Simulated Non-Local EPR Correlation: CHSH = 3
Source: Preprints.org preprint supplement (doi:10.20944/preprints202301.0570.v1), 2023-01-31
Supplement: Supplementary file 1 [file supplementary › EPR correlations Sanctuary/Txt files/NEQP.txt]

0	0.998610228
5	0.97128912
10	0.943968012
15	0.916646903
20	0.889325795
25	0.862004686
30	0.834683578
35	0.80736247
40	0.780041361
45	0.752720253
50	0.725399144
55	0.698078036
60	0.670756928
65	0.643435819
70	0.616114711
75	0.588793602
80	0.561472494
85	0.534151386
90	0.493169723
95	0.465848614
100	0.438527506
105	0.411206398
110	0.383885289
115	0.356564181
120	0.329243072
125	0.301921964
130	0.274600856
135	0.247279747
140	0.219958639
145	0.19263753
150	0.165316422
155	0.137995314
160	0.110674205
165	0.083353097
170	0.056031988
175	0.02871088
180	0.001389772
185	0.02871088
190	0.056031988
195	0.083353097
200	0.110674205
205	0.137995314
210	0.165316422
215	0.19263753
220	0.219958639
225	0.247279747
230	0.274600856
235	0.301921964
240	0.329243072
245	0.356564181
250	0.383885289
255	0.411206398
260	0.438527506
265	0.465848614
270	0.506830277
275	0.534151386
280	0.561472494
285	0.588793602
290	0.616114711
295	0.643435819
300	0.670756928
305	0.698078036
310	0.725399144
315	0.752720253
320	0.780041361
325	0.80736247
330	0.834683578
335	0.862004686
340	0.889325795
345	0.916646903
350	0.943968012
355	0.97128912
360	0.998610228
