# Supplementary material for: Simulated Non-Local EPR Correlation: CHSH = 3
Source: Preprints.org preprint supplement (doi:10.20944/preprints202301.0570.v1), 2023-01-31
Supplement: Supplementary file 1 [file supplementary › EPR correlations Sanctuary/Txt files/QMvsQUAT.txt]

0	0.01628831
5	0.008688425
10	0.006256749
15	0.002401464
20	-0.002733738
25	-0.008873297
30	-0.015763145
35	-0.02317261
40	-0.030744948
45	-0.03805701
50	-0.045457106
55	-0.051677849
60	-0.056192494
65	-0.05844108
70	-0.057777777
75	-0.053551227
80	-0.045223101
85	-0.032145179
90	0.027341407
95	0.045675572
100	0.058601664
105	0.06677796
110	0.070852661
115	0.071364095
120	0.068963612
125	0.064297063
130	0.057924398
135	0.050391326
140	0.043211914
145	0.035791172
150	0.028533302
155	0.021795029
160	0.015807036
165	0.010823403
170	0.007119672
175	0.004839557
180	0.00408868
185	0.005009844
190	0.007441291
195	0.01129635
200	0.016431331
205	0.022570676
210	0.029460318
215	0.036869588
220	0.044441742
225	0.051753633
230	0.059153573
235	0.065374176
240	0.069888696
245	0.072137175
250	0.071473783
255	0.067247164
260	0.058918988
265	0.045841035
270	-0.01364556
275	-0.031979716
280	-0.044905777
285	-0.053082023
290	-0.057156654
295	-0.057668
300	-0.05526741
305	-0.050600737
310	-0.044227931
315	-0.036694702
320	-0.029515119
325	-0.022094194
330	-0.014836129
335	-0.00809765
340	-0.002109444
345	0.00287441
350	0.006578367
355	0.008858712
360	0.00960982
