# Supplementary material for: Simulated Non-Local EPR Correlation: CHSH = 3
Source: Preprints.org preprint supplement (doi:10.20944/preprints202301.0570.v1), 2023-01-31
Supplement: Supplementary file 1 [file supplementary › EPR correlations Sanctuary/Txt files/RawData.txt]

0	0.001390	0.998610	0.506754	0.493246
5	0.028711	0.971289	0.477536	0.522464
10	0.056032	0.943968	0.454692	0.545308
15	0.083353	0.916647	0.434885	0.565115
20	0.110674	0.889326	0.418113	0.581887
25	0.137995	0.862005	0.404414	0.595586
30	0.165316	0.834684	0.393789	0.606211
35	0.192638	0.807362	0.386200	0.613800
40	0.219959	0.780041	0.381646	0.618354
45	0.247280	0.752720	0.380138	0.619862
50	0.274601	0.725399	0.381277	0.618723
55	0.301922	0.698078	0.385451	0.614549
60	0.329243	0.670757	0.392660	0.607340
65	0.356564	0.643436	0.402906	0.597094
70	0.383885	0.616115	0.416215	0.583785
75	0.411206	0.588794	0.432608	0.567392
80	0.438528	0.561472	0.452036	0.547964
85	0.465849	0.534151	0.474500	0.525500
90	0.506830	0.493170	0.506840	0.493160
95	0.534151	0.465849	0.532264	0.467736
100	0.561472	0.438528	0.554652	0.445348
105	0.588794	0.411206	0.574004	0.425996
110	0.616115	0.383885	0.590321	0.409679
115	0.643436	0.356564	0.603555	0.396445
120	0.670757	0.329243	0.613724	0.386276
125	0.698078	0.301922	0.620858	0.379142
130	0.725399	0.274601	0.624956	0.375044
135	0.752720	0.247280	0.626028	0.373972
140	0.780041	0.219959	0.624586	0.375414
145	0.807362	0.192638	0.620109	0.379891
150	0.834684	0.165316	0.612595	0.387405
155	0.862005	0.137995	0.602046	0.397954
160	0.889326	0.110674	0.588424	0.411576
165	0.916647	0.083353	0.571727	0.428273
170	0.943968	0.056032	0.551995	0.448005
175	0.971289	0.028711	0.529228	0.470772
180	0.998610	0.001390	0.503434	0.496566
185	0.971289	0.028711	0.529313	0.470687
190	0.943968	0.056032	0.552157	0.447843
195	0.916647	0.083353	0.571965	0.428035
200	0.889326	0.110674	0.588737	0.411263
205	0.862005	0.137995	0.602435	0.397565
210	0.834684	0.165316	0.613060	0.386940
215	0.807362	0.192638	0.620649	0.379351
220	0.780041	0.219959	0.625203	0.374797
225	0.752720	0.247280	0.626711	0.373289
230	0.725399	0.274601	0.625573	0.374427
235	0.698078	0.301922	0.621399	0.378601
240	0.670757	0.329243	0.614189	0.385811
245	0.643436	0.356564	0.603944	0.396056
250	0.616115	0.383885	0.590634	0.409366
255	0.588794	0.411206	0.574241	0.425759
260	0.561472	0.438528	0.554813	0.445187
265	0.534151	0.465849	0.532349	0.467651
270	0.493170	0.506830	0.500009	0.499991
275	0.465849	0.534151	0.474586	0.525414
280	0.438528	0.561472	0.452198	0.547802
285	0.411206	0.588794	0.432845	0.567155
290	0.383885	0.616115	0.416528	0.583472
295	0.356564	0.643436	0.403295	0.596705
300	0.329243	0.670757	0.393125	0.606875
305	0.301922	0.698078	0.385991	0.614009
310	0.274601	0.725399	0.381893	0.618107
315	0.247280	0.752720	0.380821	0.619179
320	0.219959	0.780041	0.382263	0.617737
325	0.192638	0.807362	0.386741	0.613259
330	0.165316	0.834684	0.394254	0.605746
335	0.137995	0.862005	0.404803	0.595197
340	0.110674	0.889326	0.418426	0.581574
345	0.083353	0.916647	0.435122	0.564878
350	0.056032	0.943968	0.454854	0.545146
355	0.028711	0.971289	0.477621	0.522379
360	0.001390	0.998610	0.503415	0.496585
