# Supplementary material for: Simulated Non-Local EPR Correlation: CHSH = 3
Source: Preprints.org preprint supplement (doi:10.20944/preprints202301.0570.v1), 2023-01-31
Supplement: Supplementary file 1 [file supplementary › EPR correlations Sanctuary/Txt files/SimCaldiff.txt]

0	0.002779543
5	0.001866204
10	0.000952866
15	3.95267E-05
20	-0.000873811
25	-0.001787151
30	-0.002700489
35	-0.003613828
40	-0.004527166
45	-0.005440505
50	-0.006353845
55	-0.007267183
60	-0.008180522
65	-0.00909386
70	-0.010007199
75	-0.010920538
80	-0.011833877
85	-0.012747215
90	0.013660554
95	0.012747215
100	0.011833877
105	0.010920538
110	0.010007199
115	0.00909386
120	0.008180522
125	0.007267183
130	0.006353845
135	0.005440505
140	0.004527166
145	0.003613828
150	0.002700489
155	0.001787151
160	0.000873811
165	-3.95267E-05
170	-0.000952866
175	-0.001866204
180	-0.002779543
185	-0.001866204
190	-0.000952866
195	-3.95267E-05
200	0.000873811
205	0.001787151
210	0.002700489
215	0.003613828
220	0.004527166
225	0.005440505
230	0.006353845
235	0.007267183
240	0.008180522
245	0.00909386
250	0.010007199
255	0.010920538
260	0.011833877
265	0.012747215
270	-0.013660554
275	-0.012747215
280	-0.011833877
285	-0.010920538
290	-0.010007199
295	-0.00909386
300	-0.008180522
305	-0.007267183
310	-0.006353845
315	-0.005440505
320	-0.004527166
325	-0.003613828
330	-0.002700489
335	-0.001787151
340	-0.000873811
345	3.95267E-05
350	0.000952866
355	0.001866204
360	0.002779543
