# Supplementary material for: Simulated Non-Local EPR Correlation: CHSH = 3
Source: Preprints.org preprint supplement (doi:10.20944/preprints202301.0570.v1), 2023-01-31
Supplement: Supplementary file 1 [file supplementary › EPR correlations Sanctuary/Txt files/SimCos.txt]

  0 -0.98371169
  5 -0.98750628
 10 -0.97855103
 15 -0.96352442
 20 -0.94242646
 25 -0.91518124
 30 -0.88178877
 35 -0.84232495
 40 -0.79678977
 45 -0.74516426
 50 -0.68824528
 55 -0.62525495
 60 -0.55619326
 65 -0.48106021
 70 -0.39979889
 75 -0.31237134
 80 -0.21887244
 85 -0.11930217
 90  0.02734008
 95  0.13282992
100  0.23224839
105  0.32559551
110  0.41287128
115  0.49398082
120  0.56896208
125  0.63787199
130  0.70071054
135  0.75749670
140  0.80925503
145  0.85494199
150  0.89455760
155  0.92810185
160  0.95549885
165  0.97674860
170  0.99192699
175  1.00103403
180  1.00408868
185  1.00120478
190  0.99224953
195  0.97722292
200  0.95612496
205  0.92887974
210  0.89548727
215  0.85602345
220  0.81048827
225  0.75886276
230  0.70194378
235  0.63895345
240  0.56989176
245  0.49475871
250  0.41349739
255  0.32606984
260  0.23257094
265  0.13300067
270 -0.01364158
275 -0.11913142
280 -0.21854989
285 -0.31189701
290 -0.39917278
295 -0.48028232
300 -0.55526358
305 -0.62417349
310 -0.68701204
315 -0.74379820
320 -0.79555653
325 -0.84124349
330 -0.88085910
335 -0.91440335
340 -0.94180035
345 -0.96305010
350 -0.97822849
355 -0.98733553
360 -0.99039018
