# Supplementary material for: Simulated Non-Local EPR Correlation: CHSH = 3
Source: Preprints.org preprint supplement (doi:10.20944/preprints202301.0570.v1), 2023-01-31
Supplement: Supplementary file 1 [file supplementary › EPR correlations Sanctuary/Txt files/SimFM.txt]

  0  0.01350877
  5 -0.04492804
 10 -0.09061501
 15 -0.13023062
 20 -0.16377487
 25 -0.19117187
 30 -0.21242162
 35 -0.22760001
 40 -0.23670705
 45 -0.23972375
 50 -0.23744699
 55 -0.22909888
 60 -0.21467940
 65 -0.19418857
 70 -0.16756946
 75 -0.13478413
 80 -0.09592745
 85 -0.05099940
 90  0.01367953
 95  0.06452715
100  0.10930341
105  0.14800831
110  0.18064186
115  0.20710918
120  0.22744823
125  0.24171592
130  0.24991225
135  0.25205620
140  0.24917230
145  0.24021705
150  0.22519044
155  0.20409247
160  0.17684726
165  0.14345479
170  0.10399097
175  0.05845579
180  0.00686822
185  0.05862655
190  0.10431351
195  0.14392912
200  0.17747337
205  0.20487037
210  0.22612012
215  0.24129851
220  0.25040555
225  0.25342225
230  0.25114549
235  0.24279738
240  0.22837790
245  0.20788707
250  0.18126797
255  0.14848263
260  0.10962595
265  0.06469790
270  0.00001897
275 -0.05082865
280 -0.09560491
285 -0.13430981
290 -0.16694336
295 -0.19341068
300 -0.21374973
305 -0.22801742
310 -0.23621375
315 -0.23835770
320 -0.23547380
325 -0.22651855
330 -0.21149194
335 -0.19039397
340 -0.16314876
345 -0.12975629
350 -0.09029247
355 -0.04475729
360  0.00683028
