# Supplementary material for: Simulated Non-Local EPR Correlation: CHSH = 3
Source: Preprints.org preprint supplement (doi:10.20944/preprints202301.0570.v1), 2023-01-31
Supplement: Supplementary file 1 [file supplementary › EPR correlations Sanctuary/Txt files/SimIVTrig.txt]

  0 -0.99722046
  5 -0.94257824
 10 -0.88793602
 15 -0.83329381
 20 -0.77865159
 25 -0.72400937
 30 -0.66936716
 35 -0.61472494
 40 -0.56008272
 45 -0.50544051
 50 -0.45079829
 55 -0.39615607
 60 -0.34151386
 65 -0.28687164
 70 -0.23222942
 75 -0.17758720
 80 -0.12294499
 85 -0.06830277
 90  0.01366055
 95  0.06830277
100  0.12294499
105  0.17758720
110  0.23222942
115  0.28687164
120  0.34151386
125  0.39615607
130  0.45079829
135  0.50544051
140  0.56008272
145  0.61472494
150  0.66936716
155  0.72400937
160  0.77865159
165  0.83329381
170  0.88793602
175  0.94257824
180  0.99722046
185  0.94257824
190  0.88793602
195  0.83329381
200  0.77865159
205  0.72400937
210  0.66936716
215  0.61472494
220  0.56008272
225  0.50544051
230  0.45079829
235  0.39615607
240  0.34151386
245  0.28687164
250  0.23222942
255  0.17758720
260  0.12294499
265  0.06830277
270 -0.01366055
275 -0.06830277
280 -0.12294499
285 -0.17758720
290 -0.23222942
295 -0.28687164
300 -0.34151386
305 -0.39615607
310 -0.45079829
315 -0.50544051
320 -0.56008272
325 -0.61472494
330 -0.66936716
335 -0.72400937
340 -0.77865159
345 -0.83329381
350 -0.88793602
355 -0.94257824
360 -0.99722046
