# Supplementary material for: Simulated Non-Local EPR Correlation: CHSH = 3
Source: Preprints.org preprint supplement (doi:10.20944/preprints202301.0570.v1), 2023-01-31
Supplement: Supplementary file 1 [file supplementary › EPR correlations Sanctuary/Txt files/zero.txt]

0	0
5	0
10	0
15	0
20	0
25	0
30	0
35	0
40	0
45	0
50	0
55	0
60	0
65	0
70	0
75	0
80	0
85	0
90	0
95	0
100	0
105	0
110	0
115	0
120	0
125	0
130	0
135	0
140	0
145	0
150	0
155	0
160	0
165	0
170	0
175	0
180	0
185	0
190	0
195	0
200	0
205	0
210	0
215	0
220	0
225	0
230	0
235	0
240	0
245	0
250	0
255	0
260	0
265	0
270	0
275	0
280	0
285	0
290	0
295	0
300	0
305	0
310	0
315	0
320	0
325	0
330	0
335	0
340	0
345	0
350	0
355	0
360	0
